1 **Inference of Granger-causal relations in molecular systems — a case study of the functional hierarchy**  
2 **among actin regulators in lamellipodia**

3

4 Jungsik Noh<sup>1</sup>, Tadamoto Isogai<sup>1</sup>, Joseph Chi, Kushal Bhatt and Gaudenz Danuser<sup>2</sup>

5

6 Lyda Hill Department of Bioinformatics, UT Southwestern Medical Center, Dallas, TX 75390, USA

7 <sup>1</sup> These authors contributed equally

8 <sup>2</sup> Correspondence: [Gaudenz.Danuser@UTSouthwestern.edu](mailto:Gaudenz.Danuser@UTSouthwestern.edu)

9

## 10 **Abstract**

11 Many cell regulatory systems implicate significant nonlinearity and redundancy among components.  
12 The regulatory network governing the formation of lamellipodial and lamellar actin structures is prototypical of  
13 such a system, containing tens of actin-nucleating and -modulating molecules with strong functional overlap.  
14 Due to instantaneous compensation, the strategy of phenotyping the system response to perturbation of  
15 individual components provides limited information on the roles the targeted component plays in the  
16 unperturbed system. Accordingly, despite the very rich data on lamellipodial actin assembly, we have an  
17 incomplete understanding of how individual actin regulators contribute to lamellipodial dynamics. Here, we  
18 present a case study of perturbation-free reconstruction of cause-effect relations among actin regulators,  
19 applying the framework of Granger-causal inference to constitutive image fluctuations that indicate regulator  
20 recruitment and dissociation. Our analysis defines distinct active zones for actin regulators within the  
21 lamellipodia and lamella and establishes actin-dependent and actin-independent causal relations with actin  
22 filament assembly and edge motion. We demonstrate the specificity and sensitivity of the analysis and propose  
23 that edge motion is driven by assembly of two independently operating actin filament structures.

## 25 **Introduction**

26 Many cell functions are governed by complex biochemical and biophysical regulatory circuits with  
27 functional overlaps – or redundancy – among components, as well as feed-back and feed-forward interactions.  
28 This represents a major challenge in the study of component functions. The dogma in the field prescribes that  
29 ‘mechanism’ of cellular regulation ought to be deduced by phenotyping under component perturbation.  
30 However, in the face of redundancy and nonlinearity phenotypes are strictly uninterpretable with respect to the  
31 function of the perturbed component (1, 2). Phenotypes show how the circuit adapts to the perturbation, which  
32 is generally not equivalent to the function the targeted component assumes in the unperturbed circuit. Of note,  
33 the disconnection between phenotype and component function is intrinsic to the nonlinearity and redundancy  
34 of the circuit and does not relate to the widely-discussed additional complication of genetic and proteolytic  
35 cellular adaptation to long-term perturbation (3). To dissect cellular regulation the field needs novel approaches  
36 that overcome the limitations of probing by perturbation.

37 A prototypical case of a complex regulatory circuit is the machinery driving the formation of lamellipodia  
38 and lamella actin networks (4, 5). In migrating cells, lamellipodia form as part of the leading edge. In non-  
39 polarized cells lamellipodia-like structures emerge in the form of surface ruffles serving as mechanical and  
40 chemical probes of the surrounding and as modulators of the subcellular organization of molecular signals (6).  
41 Lamellipodia formation is driven by the assembly of a dynamic filamentous actin (F-actin) network. The  
42 dynamics of network assembly is controlled by dozens of actin-binding proteins with distinct structural and  
43 kinetic properties (4, 7-9). The complexity in architectural dynamics is superimposed by the complexity of  
44 biochemical signal, which orchestrate F-actin dynamics via branching, elongation, capping, and severing in  
45 response to cell-intrinsic and -extrinsic mechanical and chemical cues. (Figure 1A). Although genetic and  
46 molecular perturbation have been instrumental in compiling an inventory of the system components and their  
47 basic contributions to the lamellipodia formation process, dissection of the functional hierarchy between the  
48 various component processes has remained elusive. Perturbation of any component almost instantaneously  
49 rebalances the stoichiometry and configuration of interactions among the diverse actin regulators (5).

50 Live cell fluorescence imaging combined with computer vision algorithms emerged as a perturbation-  
51 conscientious complementary approach designed to study molecular pathways embedded in actin regulatory  
52 networks (2, 5, 10-14). Molecular activities, including fluorescence intensity fluctuations and spatial recruitment  
53 profiles of e.g., actin modulators, were extracted from live cell movies to study their association with the F-actin  
54 network during protrusion/retraction events. Fluctuation time series were then exploited to establish the  
55 spatiotemporal coordination among the molecular and morphodynamic activities, assuming that the numerical  
56 coupling of the two is an indicator of local functional relations (10, 11, 13-17). This paradigm has also been  
57 applied to the analysis of regulatory signals upstream of actin dynamics (18-21). However, these analyses do  
58 not inform on the causal relation between activities.

59 Given a set of temporally resolved variables, the hierarchy of cause-and-effect relations can be inferred  
60 by statistical assessment of the power of the signal of a putative cause for the prediction of the signal of a  
61 putative effector (Figure 1B). This analysis is distinct from a correlation analysis, which merely infers the level  
62 of co-fluctuations between two variables. Two variables without causal coupling may be highly correlated  
63 because of a common input (Figure 1B). The notion of inferring causality based on the prediction power of one

64 variable for another has long been employed in econometrics and neurophysiology (22, 23). The most popular  
65 of these frameworks is the Granger-causality (GC) analysis, which defines a statistical test of the hypothesis  
66 that past observations of one variable possess indispensable information for explaining the current and future  
67 observations of a second variable (24). Because of the explicit temporal direction in the relationships, the GC  
68 framework also permits analysis of nonlinear regulatory motifs such as feedback, redundant pathways, and  
69 even nested feedbacks (Figures 1C-1E). These are common sources of complexity in molecular systems such  
70 as the lamellepodial F-actin network.

71 Granger-causal (G-causal) relations must be interpreted only within the system of observable variables.  
72 For example, if the observed signal of a variable  $X$  is causative for an unobserved latent factor that is causative  
73 for the observed signal of a variable  $Y$ , then  $X$  will be determined as G-causal for  $Y$  (Figure 1F). While in many  
74 biological studies, knowledge of such indirect relations can yield great insight for practical purposes, the  
75 prediction of G-causal relation is not to be mistaken for a causality that pinpoints direct molecular interactions.  
76 Accordingly, we refer to G-causal relations in regulatory networks as functional causality. In contrast, the  
77 prediction of Granger-noncausality has the strong implication that the two considered variables are  
78 independent, regardless of any latent factor (Figure 1G). This property permits the exclusion of functional  
79 relations at the level of the whole system based on a partially observed system (25).

80 In this work, we illustrate GC analysis of lamellipodial F-actin regulation. Using multivariate time-series  
81 representing the spatiotemporal molecular and cell morphological dynamics of the system, we build generative  
82 stochastic models that capture the information within the system. Our GC analytical pipeline, for example,  
83 shows that actin dynamics at the most proximal zone, i.e.  $\sim 0\text{--}0.7\ \mu\text{m}$  from the cell edge Granger-causes (G-  
84 causes) edge motion, while actin more distal from the cell edge (zones  $\sim 0.7\text{--}1.4\ \mu\text{m}$ ) is predicted as Granger-  
85 noncausal (G-noncausal) for edge motion. Notably, this latter zone showed a strong positive correlation  
86 between F-actin dynamics and edge motion, demonstrating that GC analysis is distinct from correlation:  
87 Correlation is not causation. We further applied the GC pipeline to identify the causal relations between actin  
88 modulators and F-actin dynamics. For Arp2/3 and VASP, for example, our analysis determines that both  
89 modulators G-cause edge motion yet operate independently from each other in distinct pathways. This  
90 suggests that at least two structurally, molecularly and kinetically distinct actin networks exist to coordinate

91 edge motion – a conclusion that is inaccessible by conventional perturbation and correlation-dependent  
92 approaches.

## 94 **Results**

### 95 **Workflow of Granger-causal pathway inference between regulators of lamellipodial actin dynamics**

96 To study Granger-causal relationships between actin regulators during lamellipodia dynamics, we  
97 required time series of their recruitment profiles as the cell underwent spontaneous events of protrusion and  
98 retraction. We accomplished this by fluorescently tagging actin regulators at very low concentration or  
99 endogenously, so as to not perturb the endogenous stoichiometry among regulators, followed by imaging their  
100 intensity fluctuations over time (Figure 2(i)). Importantly, by ensuring very low expression of the labelled  
101 regulator, local intensity changes largely reflect the specific association of regulator with F-actin (26). We  
102 illustrate the workflow of time series extraction and analysis with Arp2/3 as the test case. We endogenously  
103 tagged Arp3 with HaloTag (Halo) using CRISPR/Cas9 in U2OS cells, and co-imaged Arp3-Halo<sup>CR</sup> in the  
104 presence of very low levels of mNeonGreen-tagged actin expressed under a truncated CMV promoter. Cycles  
105 of edge protrusion and retraction events were sampled every 3 seconds for 15 minutes. Visual inspection of  
106 these cycles in conjunction with the F-actin dynamics revealed the well-established characteristics of a  
107 lamellipodium with actin treadmilling at the cell front and a lamella with slower and spatially less coherent actin  
108 dynamics beneath (15) (Video S1).

109 To capture fluctuation time series of edge motion and underlying cytoskeletal dynamics, we partitioned  
110 the protruding and retracting front of the cell into submicron-scale probing windows, and tracked their positions  
111 over time so that they maintained a constant relation with an edge sector of the same submicron scale, as  
112 described previously (18, 27). This generates a coordinate system that allows simultaneous registration of  
113 spatiotemporal fluorescent intensity fluctuations and cell edge protrusion/retraction dynamics (Figure 2(ii),  
114 Video S2-S3). The size of the probing windows was fine-tuned to be several-fold smaller than the average  
115 length scale of protrusion and retraction events, and small enough to capture the distinct cytoskeleton  
116 dynamics in lamellipodium and lamella. Specifically, the lamellipodia depth in the U2OS cells measured 1.4  
117  $\mu\text{m}$ , on average. Thus, for our spatial analyses, we defined the lamellipodia region as the band  $\sim 0\text{--}1.4 \mu\text{m}$

118 from the cell edge and the lamella region as the band  $\sim 1.4\text{--}2.9\ \mu\text{m}$  from the cell edge. We further divided these  
119 regions into half to examine potential spatial gradients in Arp2/3 and actin activities within each region. For  
120 each probing window we then read out time series of locally averaged Arp2/3 and actin intensities and mapped  
121 them into space-time matrices, which conveniently display the cyclic dynamics of Arp2/3 recruitment and F-  
122 actin assembly (Figure 2(iii), See Methods). For the window row at the cell front, we also read out the average  
123 velocity, with positive and negative values indicating protrusion and retraction, respectively. Of note, any  
124 probing window in layer 2 and higher is unambiguously associated with one probing window in layer 1. This  
125 permits the analysis of causal relations between different types of events, e.g. Arp2/3 and velocity, or Arp2/3  
126 and another actin regulator, in the same or different window layers.

127 To illustrate the inference of GC relations we focus first on the questions ‘how causal’ Arp2/3  
128 recruitment to a particular target window is for the assembly of actin in the same window, and ‘how causal’ this  
129 F-actin response is for cell edge motion at that location. Per Granger’s definition (22), Arp2/3 recruitment is  
130 Granger-causal (G-causal) for actin, if the Arp2/3 recruitment profile is indispensable for predicting the  
131 assembly of F-actin in the same window. The focused assembly of F-actin in a window is predicted based on a  
132 multi-dimensional stochastic model that accounts for the past recruitment profiles of both F-actin and Arp2/3 in  
133 the target window as well as the surrounding windows. The model also includes the protrusion/retraction (P/R)  
134 velocities of the adjacent edge segments as potentially predictive variables for the Arp2/3–F-actin relation  
135 (Figure 1(iv), See Methods). The indispensability of Arp2/3 recruitment for F-actin assembly at a given location  
136 is statistically tested by comparing two prediction models: 1) the full model incorporating fluctuation time series  
137 of Arp2/3, F-actin and associated edge motion in the target window and the four neighboring windows, and 2)  
138 the reduced model equivalent to the full model minus the Arp2/3 fluctuation time series in the target window  
139 (Figure 2(iv)). If the Arp2/3 fluctuation series in the target window is indispensable to explain F-actin assembly,  
140 the full model will lead to a significantly better prediction performance than the reduced model. Of note,  
141 because of the additional degrees of freedom, the full model will always exhibit better prediction performance  
142 than the reduced model, as assessed by variance of the difference between predicted and measured F-actin  
143 fluctuations. The key question is whether the additional degrees of freedom *significantly* improve the prediction  
144 performance. This question is answered by application of a Fisher test on the ratio between the variances

145 under the null-hypothesis that this ratio assumes values close to 1, i.e. full model and reduced model are  
146 equally strong predictors (Figure 2(iv)). In the example of Figure 2, low P-values, therefore, indicate a causal  
147 link between Arp2/3 recruitment and F-actin assembly.

148 The subcellular GC relations distinguish direct from indirect causal interactions. For example, if a  
149 pathway entails a linear chain of biochemical interactions  $A \rightarrow B \rightarrow C$ , then A is referred to as directly causal  
150 for B, and indirectly causal for C. In Figure 2, Arp2/3 recruitment is determined to G-cause F-actin assembly.  
151 This GC relation is direct and cannot be mediated by any other observed variable, i.e. edge motion. If the  
152 pathway were to consist of a chain  $\text{Arp2/3} \rightarrow \text{edge motion} \rightarrow \text{actin}$ , then the Arp2/3 recruitment would have  
153 been dispensable in predicting F-actin assembly, i.e. the edge motion would have accounted for the actin  
154 assembly.

155 To draw firm and reproducible statistical conclusions on the causality between variables, we integrated  
156 the subcellular P-values of the GC tests for multiple independent cells. To achieve this, our pipeline tests  
157 whether the subcellular G-causal evidences appear consistently over multiple cells in independent  
158 experiments. From a statistical perspective, the *sampling unit*, i.e. the physical entity that is repeatedly  
159 measured independent from any other entity, is one cell. Since a statistical conclusion is a statement about a  
160 population of sampling units hypotheses need to be tested based on per-cell measurements, accounting for  
161 cell-to-cell variability as the main source of random variation. To accomplish this, we computed the median of  
162 P-values of GC evidences over many probing windows as the per-cell measurement. A per-cell median P-  
163 value of less than 0.05 indicates that the majority of the subcellular windows in the cell shows GC-causal  
164 interactions between the investigated variables (Figure 2(v)). Then, we test whether the per-cell median P-  
165 values of  $n$  cells are significantly smaller than the threshold 0.05, using the one-sample signed rank test. If the  
166 rank test determines that a GC relationship consistently appears in the majority of windows over independently  
167 imaged cells, we conclude that the two tested variables are causally connected (Figure 2(vi)).

168 After completing the pairwise testing of GC relationships between all variables among the observed  
169 system, causal relations are integrated and represented as a graph with variable interactions (28) (Figure  
170 2(vii)). Of note, these Granger-causality graphs may identify feedback interactions between variables. To  
171 account for spatial variation in causal interactions, we compute graphs separately for lamellipodia and lamella



(in our U2OS cell model 0–0.7  $\mu\text{m}$  and 0.7–1.4  $\mu\text{m}$  vs 1.4–2.2  $\mu\text{m}$  and 2.2–2.9  $\mu\text{m}$ , respectively). For the specific variables Arp2/3, F-actin, and edge velocity, the graphs indicate a causal interaction between Arp2/3 and actin, as expected, as well as a feedback from F-actin to Arp2/3. This feedback may be explained by the intrinsic recruitment dynamics of the dendritic polymer network, in which the nucleation of branches yields additional filaments that in turn can be branched again. Actin is also in a causal feedback relation with edge velocity, however only for the probing windows in layer 0–0.7  $\mu\text{m}$ . This indicates that the actin dynamics at greater distances from the cell edge does not cause edge motion, and that edge velocity feeds back onto F-actin assembly in the first layer of probing windows. Whereas the forward link from actin to movement relates to the conversion of actin filament growth into mechanical push of the cell edge through mechanisms such as the Brownian Ratchet (29), the feedback may be governed by several mechanisms including mechanical and chemical force-feedback from the increasing membrane tension or membrane deformation (10, 30-33). Importantly, the graphs indicate that there is no direct causal interaction between Arp2/3 and velocity. In forward direction this means that any modulation in Arp2/3 recruitment translates into modulation of edge velocity only via F-actin dynamics. The absence of a causal link in reverse direction implies that the predicted feedback from edge motion to actin in windows in layer 0–0.7  $\mu\text{m}$  is independent of Arp2/3, i.e. signals must exist that translate the morphological dynamics or variation in mechanical forces into actin nucleators other than Arp2/3. For example, this data refutes the model that bending of actin filaments pressing against the plasma membrane contributes significantly to an increased Arp2/3 recruitment (34). These first results demonstrate the power of Granger-causality analyses to functionally relate molecular processes in a hierarchical and nonlinear order.

### **Actin and Arp2/3 fluctuations correlate with edge velocity**

To highlight the difference between G-causal relations and correlative relations, we focus on the cross-correlations (CCs) between the same three variables Arp2/3, F-actin, and edge velocity. For both GC analysis and correlation analysis it is essential that the time scales of fluctuations match between variables. A straightforward approach to determine the time scale of stochastic time series is the auto-correlation function (ACF). The ACF of edge velocities averaged over ~100 windows per cell and integrated over 10 cells,



199 displayed a characteristic main lobe with a time-lag of  $\sim 30$  s for the maximal negative correlation, which  
200 corresponds to half of the dominant P/R cycle of  $\sim 60$  s (Figure 3A). In stark contrast, the ACFs of F-actin and  
201 Arp2/3 displayed much longer cycles of  $> 4$  min (Figures 3B and 3C). These cycles correspond to higher  
202 variation in baseline F-actin and Arp2/3 recruitment, visible in the space-time maps of Figure 2(iii) as broad  
203 'smears' across all windows. Intriguingly, the strong visible correspondence between F-actin and Arp2/3 in the  
204 space-time map confirmed their co-modulation. However, because of the difference between time scales, we  
205 concluded that variations in baseline recruitments of F-actin and Arp2/3 were not related to edge motion.

206 Nevertheless, since Arp2/3 and F-actin dynamics are known to be related to protrusion and retraction  
207 dynamics, we hypothesized that the overall F-actin and Arp2/3 fluctuation signals ought to contain shorter time  
208 scale fluctuations that should align with that of edge motion cycles, and that this information is masked by  
209 variations in the baseline recruitment profiles. To test this, we decomposed the raw time series of F-actin and  
210 Arp2/3 recruitment into low-frequency (LF) oscillations and low-frequency subtracted (LFS) oscillations  
211 (Figures 3B-3E, see Methods). The LFS time series of both F-actin and Arp2/3 recruitment displayed the same  
212 space-time fluctuation patterns as that of edge velocity. Indeed, the ACFs of the LFS signals closely matched  
213 the ACF of edge velocities (Figures 3F and 3G). For visual validation of this result, we generated animations  
214 where the LFS-recruitment of F-actin and Arp2/3 co-fluctuated very clearly with edge movements (Video S4),  
215 whereas the low-frequency baseline recruitment appeared unrelated to the cell edge movement.

216 To determine the coupling between LFS-recruitment and edge motion in quantitative terms, we  
217 computed the cross-correlation (CC) between the LFS variables and edge velocity in each window as  
218 previously described (18). For both F-actin and Arp2/3, the patterns of CC with edge velocity were  
219 homogeneous across the subcellular windows in the same layer, whereas it differed in between layers (Figures  
220 3H and 3I). We averaged the CC over the windows in each layer for each cell. The per-cell averaged CC  
221 curves as a function of time-lag were remarkably consistent over many cells ( $n = 20$ ), indicating preserved  
222 mechanisms of coordinated recruitments of F-actin and Arp2/3 during the P/R cycles (Figures 3J and 3K).  
223 Within the entire lamellipodia area (layers 1 and 2;  $\sim 0$ – $1.4 \mu\text{m}$ ), the fluctuations of F-actin assembly best  
224 correlated with the edge velocity with a time delay of  $\sim 9$  s (Figure 3J), which is in line with previous reports of  
225 correlative relations between actin recruitment and edge movement in epithelial cells (13, 14). In contrast,

Arp2/3 recruitment displayed a differential correlation pattern at the front (layer 1) and back (layer 2) of the lamellipodia. In layer 1, Arp2/3 fluctuations preceded edge velocity fluctuations by  $\sim 3$  s, whereas in layer 2, the Arp2/3 fluctuations followed the edge velocity by  $\sim 6$  s (Figure 3K).

Our correlation analysis and interpretations operate under the assumption that intensity fluctuations in F-actin and Arp2/3 are synonymous for biochemical activity, i.e. the addition or removal of actin subunits and Arp2/3 complexes, respectively, to or from the lamellipodial network. To test the validity of this assumption, we performed correlation analyses with images of diffuse HaloTag alone. The CC curves between cytoplasmic HaloTag intensities and edge velocity consistently showed positive correlation values at negative time lags and negative correlations at positive time-lags (Figure S1A). The confidence band about these correlation curves are much wider than the confidence bands for actin and Arp2/3 correlations in the lamellipodia region (Figures 3J and 3K), consistent with the notion that the timing of fluctuations in the diffuse HaloTag signal relative to cell edge movements is much less rigid than the timing of cytoskeleton components associated with cell motility. To explain the mechanism underlying the positive and negative lobes, we had to turn to kinetic maps, which indicate the average accumulation of a fluorescent signal relative to a morphodynamic event such as protrusion or retraction onset (Figure S1B), as previously described (13, 19). The typical fluorescence intensities of the cytoplasmic HaloTag reached its highest values after the fastest retraction, which explained the negative correlations between the HaloTag and edge velocity at positive time-lags. This peak of the HaloTag mean intensity was still observable before the fastest protrusion, which was captured by the positive correlations at negative time-lags. These fluctuation patterns of cytoplasmic HaloTag depicted systematic volume changes near the edge during P/R cycles, where the volume was maximized right before the protrusion onset and minimized at or right before the retraction onset as the cell edge maximally stretched out.

The CC pattern of a diffuse, cytoplasmic HaloTag with edge velocity resembled the CC patterns of both actin and Arp2/3 with edge velocity in the most distal region we analyzed (layer 4; 2.2–2.9  $\mu\text{m}$ ) (Figures 3J and 3K). This suggests that in the lamella, the LFS F-actin and Arp2/3 signals reflect a fraction of fluorescent probes that are diffusing in contrast to the relatively static cytoskeleton structures in the lamella such as cortical actin fibers, whose fluorescence fluctuations are captured by the LF baseline recruitment signal. The CC patterns of F-actin and Arp2/3 recruitments with edge velocity in the transitional region 1.4–2.2  $\mu\text{m}$  (layer 3)

exhibited a mixture of the lamellipodial and cytoplasmic CC curves. This shows that the CC curves of F-actin and Arp2/3 differentiate two distinct cytoskeleton behaviors in lamellipodium and lamella, and that the lamellipodium-to-lamella transition in U2OS cells locates in the 1.4–2.2  $\mu\text{m}$  region.

### **A generative stochastic model to distinguish causation from correlation**

Since cytoplasmic, biologically non-functional signals still correlated with edge velocity, correlations alone are insufficient to identify causal functions of molecules in lamellipodial dynamics. To accomplish causal inference, we had to formulate a generative, stochastic model that specifies the dependencies of the edge velocities on molecular activities in subcellular space and time. Towards such a model, we first assembled a spatially propagating autoregressive (SPAR) model that prescribes the spatial propagation of molecular activities in a target window to four adjacent windows (Figure S1C, See Methods). Analysis of actin dynamics by the SPAR model detected propagation of F-actin signal fluctuations in retrograde direction in regions with prominent actin retrograde flow, as expected (Figure 4A, Video S5). It also revealed that actin fluctuations propagate laterally throughout the entire lamellipodia. In contrast, per the SPAR model fluctuations in the cytoplasmic HaloTag signal did not spatially propagate in most lamellipodia/lamella regions (Figure 4B, Video S6). This illustrates the power of SPAR analysis to differentiate between spatiotemporally propagated and non-propagated molecular activities.

### **GC analysis identifies a causal chain from Arp2/3 to F-actin to edge velocity at the lamellipodia front**

By extending the SPAR model, we formulated a generative stochastic model between two spatiotemporally coupled molecular activities and edge velocity (Figure 2(iv)). Applied to the analysis of lamellipodia dynamics, we first statistically tested the causal effect of Arp2/3 recruitment on F-actin assembly at each subcellular probing window in the cell shown in Figure 2(i). Most windows in the lamellipodia region (layers 1 and 2;  $\sim 0$ –1.4  $\mu\text{m}$ ) displayed significant GC P-values, whereas the Arp2/3 did not G-cause actin fluctuation in the majority of windows outside the lamellipodia (layers 3;  $\sim 1.4$ –2.2  $\mu\text{m}$ ) (Figures 4C and S2A). As one would expect, F-actin fluctuations at the lamellipodia front (layer 1) had G-causal effects on edge motion, with almost all probing windows showing P-values  $< 0.0001$  (Figure 4D). The strong GC relation from

280 F-actin to motion was sharply reduced to a median P-value of 0.032 over all windows at the lamellipodia base  
281 (layer 2, Figure S2B). This demonstrates the high spatial resolution of the SPAR models in delineating spatial  
282 zones of distinct causal hierarchy among subcellular events. In agreement with the spatial gradient in  
283 causation, F-actin fluctuations at the lamellipodium-to-lamella transition and the lamella were G-noncausal for  
284 edge velocity in most windows (median P-values 0.419 and 0.571 over all windows in layers 3 and 4,  
285 respectively; Figure 4D and not shown). For the remaining combinations of pairwise relations between F-actin,  
286 Arp2/3 and edge velocity, we found distinct subcellular patterns of causality reflecting the fine-grained spatial  
287 regulation of the lamellipodial and lamellar actin machinery (Video S7-S12).

288 We then examined whether the patterns of G-causal relations identified in a single cell were  
289 reproducible in cells imaged over independent experimental sessions (Figure 4E). Applied to a population of  $n$   
290 = 20 cells, these statistical analyses confirmed a causal relation from Arp2/3 to F-actin assembly in layers 1  
291 and 2 (~0–1.4  $\mu\text{m}$ ) but not in layers 3 and 4. Our data also showed that F-actin assembly G-causes Arp2/3  
292 recruitment in the lamellipodia (rank test P-values < 0.001), confirming the autocatalytic properties of Arp2/3-  
293 mediated dendritic nucleation model (35-38). Both forward and feedback causal relations between Arp2/3 and  
294 F-actin were insignificant in layers 3 and 4 (rank test P-values > 0.522, Figure 2(vii)), demonstrating that the  
295 Arp2/3-actin functional interaction involved in the fast oscillating P/R events is confined to the lamellipodia  
296 area. Similarly, the analysis of median P-values in cell cohorts supported a strong G-causal relation from F-  
297 actin to edge motion (rank test  $P = 0.001$ , Figure 4E), but no significant relation deeper into the lamellipodia  
298 (rank test  $P = 0.935$ ; Figure 4E).

299 A critical insight gained from a SPAR model that combines Arp2/3, F-actin, and edge motion as time-  
300 resolved variables is that Arp2/3 recruitment at the lamellipodia front is not G-causal for edge velocity (rank test  
301  $P = 0.135$ , Figure 4E). Since the GC framework identifies direct causal effects that are not mediated by other  
302 observed variables, this result describes a causal cascade  $\text{Arp2/3} \rightarrow \text{F-actin} \rightarrow \text{edge velocity}$ , i.e. any causal  
303 effect from Arp2/3 recruitment to edge motion is fully mediated by F-actin assembly. Indeed, when we  
304 excluded the F-actin data from the SPAR model, the GC pipeline predicted a strong G-causal relation from  
305 Arp2/3 to edge velocity in layer 1 (rank test  $P < 0.001$ ), but not in layer 2 (rank test  $P = 0.977$ , Figures S2C-

S2E). This shows that the proposed mechanism of G-causal inference distinguishes direct from indirect causal effects among the observed components of a molecular system.

### **Interpretation and specificity of GC relations**

The change in GC topology between the two- and three-component system implied that the Arp2/3 recruitment variable is dispensable for the prediction of edge velocity under consideration of F-actin assembly fluctuations (Figures S2F-S2H and 2(vii)). This result rules out the possibility that any other variable in the system besides F-actin could be mediating the causal effect of Arp2/3 on edge velocity. If such a hidden mediator were to exist, then the GC analysis in the three-component model would predict an additional G-causal relation from Arp2/3 to edge velocity bypassing F-actin.

To further validate the specificity of GC inference, we applied the pipeline to an inert HaloTag cytoplasmic control data (n = 12 cells). As expected, the analysis determined that cytoplasmic HaloTag fluctuation is non-causal for F-actin assembly or edge velocity (Figure S3, rank test P-values > 0.633), although the fluctuations correlate with edge motion quite significantly (Figure S1A). This again underlines the ability of the presented pipeline to separate causal from correlative relation.

### **mDia1 recruitment G-causes F-actin assembly at the lamellipodia base and in the lamella and an actin-independent function at the lamellipodia front**

Using the GC pipeline we set out to determine where other actin nucleators and modulators affect actin assembly and cell edge protrusion/retraction. We started with the formin family member mDia1. Formins are known to bind to the barbed-ends and processively elongate linear actin filaments. We stably depleted endogenous mDia1 in U2OS cells using lentiviral short hairpin RNA and introduced exogenous SNAP-tagged mDia1 and mNeonGreen-tagged actin under a truncated CMV promoter to follow their dynamics. Live cell movies displayed dynamic recruitment of mDia1 near the cell edge along with the edge protrusion/retraction cycles (Figure S4A, Video S13). Applying causal inference, we found no G-causal interactions of mDia1 with either actin or edge motion (Figures S4B and S4C). This result seemed to contradict previous reports that suggested in other cell types mDia1 may function as the initiator of actin assembly and protrusion (13, 38). We

333 suspected that the level of overexpression of mDia1 (Figure 5A), albeit experimentally controlled as much as  
334 possible, resulted in a significant perturbation of the stoichiometry among the nucleators, which masked  
335 mDia1's proper function. We thus inserted by CRISPR/Cas9 a SNAP-tag before mDia1's N-terminal sequence  
336 but found the resulting fluorescence movies to have too low signal-to-noise ratio (SNR) for a meaningful  
337 causality analysis (data not shown). To overcome the deficiency in SNR, we decided to endogenously tag  
338 mDia1 with a tandem mNeonGreen2-based split fluorescence protein (sFP) strategy (39) (Figure 5B), which  
339 primarily suppresses background, yet amplifies the signal.

340 Live cell movies of endogenous mDia1 displayed multiple spots of dynamic recruitment a few microns  
341 back from the cell edge, which were unobservable with exogenous expression of tagged mDia1 (Figure 5C).  
342 The spots co-localized with spots enriched for actin and they appeared to be associated with strongly  
343 protruding cell edge segments (Video S14).

344 Using CC analysis, we found that, unlike F-actin and Arp2/3, mDia1 recruitment and edge velocity  
345 correlated homogeneously across the lamellipodia and lamella. The CC curves over multiple cells ( $n = 14$ )  
346 consistently showed maximal negative values at positive lags of  $\sim 3$ -9 s (Figure S4D). Kinetic maps indicated  
347 that this negative peak was associated with mDia1 recruitment after maximal retraction and before protrusion  
348 (Figure S4E), consistent with the previous observations (13).

349 To determine how much this mDia1 recruitment causes actin assembly and edge motion, we applied  
350 the GC pathway inference pipeline to mDia1/actin live cell movies. On a per-cell basis, e.g., for the cell shown  
351 in Figure 5C, most windows at the lamellipodia base and in the lamella ( $\sim 0.7$ - $2.9 \mu\text{m}$ ) showed significant GC  
352 effects of mDia1 on F-actin recruitment (Figure 5D). For the entire cell population ( $n = 14$ ), the analysis  
353 determined causal influence of mDia1 on F-actin assembly at the lamellipodia base and lamella ( $\sim 0.7$ - $2.9 \mu\text{m}$ ,  
354 rank test  $P < 0.012$ , Figure 5E), but not at the lamellipodia front ( $0$ - $0.7 \mu\text{m}$ , rank test  $P = 0.452$ ). The observed  
355 G-causal feedback between F-actin on mDia1 (rank test  $P < 0.010$ , Figure 5E), may represent mDia1's activity  
356 to recruit profilin-bound actin for F-actin nucleation and elongation. Overall, the G-causal interaction of mDia1  
357 with F-actin together with the maximal recruitment of mDia1 during retraction events (Figure S4E) indicates  
358 that mDia1 initiates actin assembly before protrusion events at the lamellipodia base and in the lamella, in line  
359 with our previous observation (13).



360 Intriguingly, our analysis further revealed a direct G-causal relation between mDia1 and edge velocity at  
361 the cell edge, where mDia1 is not G-causal for F-actin assembly (0–0.7  $\mu\text{m}$ , rank test  $P = 0.008$  and  $P = 0.452$ ,  
362 respectively, Figure 5E). This suggests that mDia1 performs an actin-independent function related to edge  
363 dynamics and that mDia1's function as an actin elongator is irrelevant at the lamellipodia front. We conjecture  
364 that mDia1's actin-independent function in causing edge motion relates to uncapping activities of barbed-end  
365 capping proteins (40) or its role in regulating microtubules and cell-matrix adhesions (41, 42).

366 In summary, these GC analyses unveil a dual role of mDia1 in distinct spatial locations, one as a direct  
367 F-actin assembly factor at the base of the lamellipodia, and another as an indirect modulator of edge motion  
368 through actin-independent functions.

### 369 **GC analysis detects causal shifts between wild-type and mutant of VASP deficient in actin assembly**

370 Lamellipodial and lamellar F-actin assembly is regulated by numerous additional factors that are fine-  
371 tuning edge motion. In particular, the elongation factor Ena/VASP localizes to the tip of lamellipodia and  
372 accelerates elongation of actin filaments (43). We took advantage of the vast biochemical knowledge of VASP-  
373 actin interactions to test whether our GC analysis has the sensitivity to detect subtle shifts in F-actin assembly  
374 and cell edge movement as a consequence of genetic mutations in VASP.

375 We co-imaged actin with SNAP-tagged wild-type VASP (VASP<sup>WT</sup>) and Halo-tagged S239D/T278E  
376 mutant VASP (VASP<sup>MT</sup>) in a cell line with endogenous VASP knocked down (Figure S6A). In previous work the  
377 VASP<sup>MT</sup> has been described to maintain proper membrane localization, however with attenuated actin  
378 polymerization activity (44). In our U2OS cells, VASP<sup>WT</sup> localized to a narrow band of enrichment at the very tip  
379 of the lamellipodia (Figure 6A, Video S15). At large, this localization pattern applied also to VASP<sup>MT</sup>. In detail,  
380 the merged images indicated a subtle yet systematic positional shift of VASP<sup>WT</sup> towards the tip of the cell edge  
381 (Figure 6A). By CC analysis, we found that fluctuations in VASP<sup>WT</sup> recruitment preceded edge protrusions by  
382 ~3 s at the very front but were decoupled from edge motion in layers 2-4 (Figure 6B, only layers 1 and 2 are  
383 shown). The same spatiotemporal pattern arose for VASP<sup>MT</sup> recruitment (Figure 6B), although the CC peak in  
384 layer 1 was reduced compared to VASP<sup>WT</sup>.



386 In stark contrast, GC analysis identified marked differences between VASP<sup>WT</sup> and VASP<sup>MT</sup>. Shown for  
387 a representative cell, VASP<sup>WT</sup> recruitment G-causes actin assembly in most windows at the lamellipodia front  
388 (Figure 6C, median P-value 0.047) whereas VASP<sup>MT</sup> recruitment was non-causal in most windows (median P-  
389 value 0.152). The differences were consistent over a cell population sampled over multiple independent  
390 experimental sessions (n = 18). VASP<sup>WT</sup> was G-causal for F-actin assembly at the lamellipodia front (rank test  
391 P = 0.025) but not VASP<sup>MT</sup> (rank test P = 0.831, Figure 6D). This result shows the exquisite sensitivity of GC  
392 analysis in pinpointing functional differences in molecular activities that are not detectable merely by CC  
393 analysis.

394 Unexpectedly, GC analysis also indicated a direct causal relation from VASP<sup>WT</sup> to edge velocity, which  
395 was independent of the measured F-actin dynamics (rank test P < 0.001, Figure 6D). VASP<sup>MT</sup> did not show this  
396 direct causal link (rank test P = 0.831, Figure 6D), showing that the significant correlation between VASP<sup>MT</sup> and  
397 edge velocity in Figure 6B does not imply causation.

398 Next, we used GC analysis to test possible feedback from F-actin to VASP recruitment (Figure 6E).  
399 Contrary to the feedback between F-actin and Arp2/3, which accompanies dendritic nucleation of actin  
400 filaments throughout the entire lamellipodia, VASP and actin are in bidirectional GC relations only in the most  
401 distal layer of the lamella (~2.3–2.9 μm, Figure 6F). We suspect that this relation is a numerical artifact of the  
402 strong colocalization of VASP and F-actin at focal adhesions (45) (Video S15), which are stationary with  
403 respect to the substrate and thus not properly tracked by subcellular windows following the cell edge.

404 In summary, co-imaging of VASP<sup>WT</sup> and VASP<sup>MT</sup> first confirmed the biochemically characterized  
405 deficiency of VASP's S239D/T278E mutation in F-actin assembly in a living cell, second it corroborated the  
406 sensitivity of GC-analysis to distinguish correlation from causation, and finally it unveiled direct causal influence  
407 of VASP on edge motion. Notably, per our GC-analysis, VASP-elongation of F-actin was confined to the  
408 lamellipodia front, without any feedback from F-actin assembly.

409

## 410 **Two discrete actin networks independently drive edge motion**

411 Our GC pipeline has thus far delineated spatial zones in which Arp2/3, mDia1, and VASP assume  
412 differential roles in assembling F-actin. We wondered whether these three actin regulators operate in parallel

413 or whether they are causally related among themselves. Specifically, we asked whether Arp2/3 and VASP  
414 operate cooperatively, i.e. VASP elongates F-actin filaments that are nucleated by Arp2/3, or separately in  
415 differentially regulated F-actin networks (35, 46). In the cooperative case, Arp2/3 recruitment would be  
416 expected as indispensable for explaining VASP recruitment. VASP-mediated F-actin assembly may also  
417 promote Arp2/3 recruitment, which would be reflected by a G-causal relation from VASP to Arp2/3.  
418 Alternatively, if Arp2/3 and VASP operate separately, our pipeline would be expected to report no G-causal  
419 relations.

420 To test these hypotheses, we co-imaged U2OS cells ( $n = 18$ ) expressing SNAP-tagged exogenous  
421 VASP and endogenous Halo-tagged Arp3 (Figure 7A). For a representative cell, the GC tests at individual  
422 target windows at the lamellipodia front indicated that neither one of the two actin regulators are causal for the  
423 other (Figure 7B, median P-values  $> 0.222$ ). The absence of such relations was further confirmed at the level  
424 of the entire cell population for lamellipodia and lamella (Figure 7C, rank test  $P > 0.204$ ). Furthermore, like with  
425 the causal analysis of the relations between Arp2/3, actin, and edge velocity earlier, Arp2/3 and motion  
426 remained in a feedback relation regardless of VASP (Figure 7C). On the other hand, VASP is identified as G-  
427 causal for edge motion, independent of Arp2/3 (Figure 7C, rank test  $P < 0.016$ ), suggesting that Arp2/3 and  
428 VASP function in at least two distinct classes of F-actin architectures, which synergistically drive cell edge  
429 protrusion. In line with this prediction, GC pathway analysis indicated that Arp2/3 and VASP contribute as  
430 separate F-actin assembling entities to cell edge protrusion (Figure 7D). Of note, the fluctuation signals of  
431 Arp2/3 and VASP correlated strongly with zero-time lag, which relates to their concurrent recruitment during  
432 P/R cycles (Figure S6D). However, co-recruitment does not mean coupled function in this case. This  
433 underlines again the marked difference between correlation and causation analysis.

## 435 Discussion

436 When perturbed, nonlinear regulatory pathways containing feedbacks and redundancies among  
437 components tend to respond with instantaneous adaptation, the outcome of which is difficult to interpret and  
438 often ambiguous in terms of the immediate function the targeted component assumes in the unperturbed  
439 pathway. To reconstruct cause-effect relations in pathways of this characteristic, we adopt here the framework

440 of Granger causality to infer functional interactions between pathways components from live cell fluorescence  
441 imaging of the unperturbed system.

442 Our pipeline distinguishes with high sensitivity and specificity causation from correlation, and allows the  
443 unmixing of functionally distinct molecular activities, which visually seem to be represented by identical  
444 fluorescence image fluctuations. This unique feature of the pipeline is illustrated with a VASP mutant that is  
445 deficient in actin-polymerization but localizes qualitatively identically to wildtype VASP at the lamellipodia edge.  
446 Our analysis confirms that the VASP mutant is not G-causal for F-actin assembly and edge motion, although  
447 its recruitment to the leading edge positively correlates with edge motion. Moreover, our analyses reveal that  
448 different actin regulators cause F-actin assembly in distinct spatial domains within the lamellipodia and lamella.  
449 Arp2/3 is shown to be G-causal for F-actin assembly only in the lamellipodia (0–1.4  $\mu\text{m}$  from the edge), VASP  
450 only in the lamellipodia front (0–0.7  $\mu\text{m}$ ), and mDia1 at the lamellipodia base and in the lamella (0.7–2.9  $\mu\text{m}$ ,  
451 Figure S7A).

452 The Arp2/3 complex requires a pre-formed filament or “mother filament” to act as an actin branch  
453 nucleator (47). The origin and source of the mother filament remains obscure. In two independent studies, we  
454 have previously suggested that the formin family member mDia1 stimulates Arp2/3 activity *in vitro* and that  
455 mDia1 recruitment precedes lamellipodia protrusion onset *in vivo* (13, 38). Our present data in U2OS cells  
456 shows that mDia1 initiates actin assembly during retraction and is G-causal for F-actin at the lamellipodia base  
457 and in the lamella (Figure 5F). Indeed, this may be the region where mother filament seeds form prior to  
458 protrusion onset, followed by autocatalytic nucleation of branched actin after activation and recruitment of  
459 Arp2/3 more proximal to the leading edge. In addition to mDia1’s selective G-causal relation for F-actin  
460 assembly at the lamellipodia-to-lamella transition, we found a G-causal relationship directly between mDia1  
461 and edge motion at the lamellipodia front, where this nucleator is not G-causal for F-actin. We propose that this  
462 actin-independent causality for edge movement relates to mDia1’s function in freeing F-actin barbed ends from  
463 capping proteins. This result indicates the unique opportunities perturbation-free analyses generate to  
464 distinguish multi-functional properties of components. No perturbation experiment could be designed to  
465 determine this duality in mDia1 action in lamellipodia and lamella.

466 The proposed pipeline for causal inference further identified a direct causal chain at the lamellipodia  
467 front from Arp2/3 to F-actin to edge velocity with a feedback from F-actin to Arp2/3 and a chain from VASP to  
468 F-actin to edge velocity with an F-actin-polymerization independent GC relation from VASP to edge velocity  
469 (Figure S7B). Contrary to the mDia1 scenario (Figure 5F), the causal link from VASP to edge velocity is  
470 paralleled by a causal link from VASP to F-actin (Figure 6F), suggesting that the GC pipeline is capturing an  
471 additional actin-related yet F-actin-polymerization independent role of VASP relative to cell edge motion.

472 We interpret this result with a model, in which the membrane-tethered VASP bundles F-actin (either by  
473 VASP alone or in cooperation with fascin) (46, 48-50) and thus contributes to protrusion forces in parallel to  
474 VASP's activity as an actin polymerase. Indeed, the direct link to edge motion is abrogated by the mutant  
475 VASP that also abrogates F-actin bundling (51) (Figures 6D and S6C).

476 This model is also consistent with our finding that VASP- and Arp2/3-induced F-actin assembly G-  
477 causes edge motion independently from each other (Figure 7D), and highlights the sensitivity of our pipeline in  
478 deconvolving the inputs of distinct system components into a common effector – information that would have  
479 been inaccessible using traditional perturbation approaches.

480 The key limitation of the GC framework is that G-causal relations can only be determined within the  
481 system of co-observed variables (24). While the proposed pipeline determines cause-and-effect relations  
482 between pairs of molecular processes, it is not yet able to map out directly causal interactions in larger process  
483 circuits with multiple components funneling information through one common component. Remedy to this  
484 limitation will arise from the development of hyperspectral imaging of an increasing number of components (52)  
485 and from expanded multivariate GC models that integrate data from several rounds of experiments under  
486 identical conditions but different configurations of component labeling.

487

488 **Supplemental information**

489 Methods

490 Supplemental References

491 Supplemental Figures S1-S7

492 Supplemental Videos S1-S15

493

494 **Acknowledgments**

495 We thank Dr. Dick McIntosh (University of Colorado, Boulder, CO) for kindly providing the U2OS osteosarcoma  
496 cells, Dr. Tilmann Bürckstümmer and all Addgene depositors for sharing reagents and Dr. Dana Reed (UT  
497 Southwestern Medical Center) for her logistical support and laboratory management. We also thank the UT  
498 Southwestern BioHPC facility for providing high-performance computing systems. This study was supported by  
499 NIH grants K25EB028854 to JN and R35GM136428 to GD.

500

501 **Author contributions**

502 Conceptualization: G.D; Methodology: J.N., T.I.; Formal analysis: J.N., T.I., Data Curation: J.N.; Validation: T.I.,  
503 J.C., K.B.; Resources: T.I., J.C., K.B.; Investigation: G.D., T.I., J.N.; Supervision: G.D.; Funding acquisition:  
504 J.N., G.D.; Writing – original draft: J.N., T.I., G.D.; writing – review & editing: J.N., T.I., K.B., G.D.

505

506 **Declaration of interests**

507 The authors declare no competing interests.

508

509 **References**

- 510 1. Vilela M, Danuser G. What's wrong with correlative experiments? *Nat Cell Biol.* 2011;13(9):1011.  
511 2. Welf ES, Danuser G. Using fluctuation analysis to establish causal relations between cellular events without  
512 experimental perturbation. *Biophys J.* 2014;107(11):2492-8.  
513 3. Hoeller O, Gong D, Weiner OD. How to understand and outwit adaptation. *Dev Cell.* 2014;28(6):607-16.  
514 4. Insall RH, Machesky LM. Actin dynamics at the leading edge: from simple machinery to complex networks. *Dev*  
515 *Cell.* 2009;17(3):310-22.  
516 5. Isogai T, Danuser G. Discovery of functional interactions among actin regulators by analysis of image fluctuations  
517 in an unperturbed motile cell system. *Philos Trans R Soc Lond B Biol Sci.* 2018;373(1747).

- 518 6. Innocenti M. New insights into the formation and the function of lamellipodia and ruffles in mesenchymal cell  
519 migration. *Cell Adh Migr*. 2018;12(5):401-16.
- 520 7. Krause M, Gautreau A. Steering cell migration: lamellipodium dynamics and the regulation of directional  
521 persistence. *Nat Rev Mol Cell Biol*. 2014;15(9):577-90.
- 522 8. Blanchoin L, Boujemaa-Paterski R, Sykes C, Plastino J. Actin dynamics, architecture, and mechanics in cell  
523 motility. *Physiol Rev*. 2014;94(1):235-63.
- 524 9. Pollard TD. Actin and Actin-Binding Proteins. *Cold Spring Harb Perspect Biol*. 2016;8(8).
- 525 10. Mueller J, Szep G, Nemethova M, de Vries I, Lieber AD, Winkler C, et al. Load Adaptation of Lamellipodial Actin  
526 Networks. *Cell*. 2017;171(1):188-200 e16.
- 527 11. Bisaria A, Hayer A, Garbett D, Cohen D, Meyer T. Membrane-proximal F-actin restricts local membrane  
528 protrusions and directs cell migration. *Science*. 2020;368(6496):1205-10.
- 529 12. Barnhart EL, Allard J, Lou SS, Theriot JA, Mogilner A. Adhesion-Dependent Wave Generation in Crawling Cells.  
530 *Curr Biol*. 2017;27(1):27-38.
- 531 13. Lee K, Elliott HL, Oak Y, Zee CT, Groisman A, Tytell JD, et al. Functional hierarchy of redundant actin assembly  
532 factors revealed by fine-grained registration of intrinsic image fluctuations. *Cell Syst*. 2015;1(1):37-50.
- 533 14. Ji L, Lim J, Danuser G. Fluctuations of intracellular forces during cell protrusion. *Nat Cell Biol*. 2008;10(12):1393-  
534 400.
- 535 15. Ponti A, Machacek M, Gupton SL, Waterman-Storer CM, Danuser G. Two distinct actin networks drive the  
536 protrusion of migrating cells. *Science*. 2004;305(5691):1782-6.
- 537 16. Mendoza MC, Vilela M, Juarez JE, Blenis J, Danuser G. ERK reinforces actin polymerization to power persistent  
538 edge protrusion during motility. *Sci Signal*. 2015;8(377):ra47.
- 539 17. Wang C, Choi HJ, Kim SJ, Desai A, Lee N, Kim D, et al. Deconvolution of subcellular protrusion heterogeneity and  
540 the underlying actin regulator dynamics from live cell imaging. *Nat Commun*. 2018;9(1):1688.
- 541 18. Machacek M, Hodgson L, Welch C, Elliott H, Pertz O, Nalbant P, et al. Coordination of Rho GTPase activities  
542 during cell protrusion. *Nature*. 2009;461(7260):99-103.
- 543 19. Azoitei ML, Noh J, Marston DJ, Roudot P, Marshall CB, Daugird TA, et al. Spatiotemporal dynamics of GEF-H1  
544 activation controlled by microtubule- and Src-mediated pathways. *J Cell Biol*. 2019;218(9):3077-97.
- 545 20. Yang HW, Collins SR, Meyer T. Locally excitable Cdc42 signals steer cells during chemotaxis. *Nat Cell Biol*.  
546 2016;18(2):191-201.
- 547 21. Marston DJ, Vilela M, Huh J, Ren J, Azoitei ML, Glekas G, et al. Multiplexed GTPase and GEF biosensor imaging  
548 enables network connectivity analysis. *Nat Chem Biol*. 2020;16(8):826-33.
- 549 22. Granger C. Investigating Causal Relations by Econometric Models and Cross-Spectral Methods. *Econometrica*.  
550 1969;37(3):424-38.
- 551 23. Bressler SL, Seth AK. Wiener-Granger causality: a well established methodology. *Neuroimage*. 2011;58(2):323-9.
- 552 24. Eichler M. Causal inference with multiple time series: principles and problems. *Philos Trans A Math Phys Eng Sci*.  
553 2013;371(1997):20110613.
- 554 25. Eichler M. Granger causality and path diagrams for multivariate time series. *J Econometrics*. 2007;137(2):334-53.
- 555 26. Danuser G, Waterman-Storer CM. Quantitative fluorescent speckle microscopy of cytoskeleton dynamics. *Annu*  
556 *Rev Biophys Biomol Struct*. 2006;35:361-87.
- 557 27. Ma X, Dagliyan O, Hahn KM, Danuser G. Profiling cellular morphodynamics by spatiotemporal spectrum  
558 decomposition. *PLoS Comput Biol*. 2018;14(8):e1006321.
- 559 28. Sugiyama K, Tagawa S, Toda M. Methods for Visual Understanding of Hierarchical System Structures. *Ieee T Syst*  
560 *Man Cyb*. 1981;11(2):109-25.
- 561 29. Mogilner A, Oster G. Cell motility driven by actin polymerization. *Biophys J*. 1996;71(6):3030-45.
- 562 30. Higashida C, Kiuchi T, Akiba Y, Mizuno H, Maruoka M, Narumiya S, et al. F- and G-actin homeostasis regulates  
563 mechanosensitive actin nucleation by formins. *Nat Cell Biol*. 2013;15(4):395-405.
- 564 31. Batchelder EL, Hollopeter G, Campillo C, Mezanges X, Jorgensen EM, Nassoy P, et al. Membrane tension  
565 regulates motility by controlling lamellipodium organization. *Proc Natl Acad Sci U S A*. 2011;108(28):11429-34.
- 566 32. Bieling P, Li TD, Weichsel J, McGorty R, Jreij P, Huang B, et al. Force Feedback Controls Motor Activity and  
567 Mechanical Properties of Self-Assembling Branched Actin Networks. *Cell*. 2016;164(1-2):115-27.



- 568 33. Lou HY, Zhao W, Li X, Duan L, Powers A, Akamatsu M, et al. Membrane curvature underlies actin reorganization  
569 in response to nanoscale surface topography. *Proc Natl Acad Sci U S A*. 2019;116(46):23143-51.
- 570 34. Risca VI, Wang EB, Chaudhuri O, Chia JJ, Geissler PL, Fletcher DA. Actin filament curvature biases branching  
571 direction. *Proc Natl Acad Sci U S A*. 2012;109(8):2913-8.
- 572 35. Pollard TD, Borisy GG. Cellular motility driven by assembly and disassembly of actin filaments. *Cell*.  
573 2003;112(4):453-65.
- 574 36. Blanchoin L, Pollard TD, Mullins RD. Interactions of ADF/cofilin, Arp2/3 complex, capping protein and profilin in  
575 remodeling of branched actin filament networks. *Curr Biol*. 2000;10(20):1273-82.
- 576 37. Carlsson AE. Growth velocities of branched actin networks. *Biophys J*. 2003;84(5):2907-18.
- 577 38. Isogai T, van der Kammen R, Leyton-Puig D, Kedziora KM, Jalink K, Innocenti M. Initiation of lamellipodia and  
578 ruffles involves cooperation between mDia1 and the Arp2/3 complex. *J Cell Sci*. 2015;128(20):3796-810.
- 579 39. Kamiyama D, Sekine S, Barsi-Rhyme B, Hu J, Chen B, Gilbert LA, et al. Versatile protein tagging in cells with split  
580 fluorescent protein. *Nat Commun*. 2016;7:11046.
- 581 40. Shekhar S, Kerleau M, Kuhn S, Pernier J, Romet-Lemonne G, Jegou A, et al. Formin and capping protein together  
582 embrace the actin filament in a menage a trois. *Nat Commun*. 2015;6:8730.
- 583 41. Ishizaki T, Morishima Y, Okamoto M, Furuyashiki T, Kato T, Narumiya S. Coordination of microtubules and the  
584 actin cytoskeleton by the Rho effector mDia1. *Nat Cell Biol*. 2001;3(1):8-14.
- 585 42. Yamana N, Arakawa Y, Nishino T, Kurokawa K, Tanji M, Itoh RE, et al. The Rho-mDia1 pathway regulates cell  
586 polarity and focal adhesion turnover in migrating cells through mobilizing Apc and c-Src. *Mol Cell Biol*. 2006;26(18):6844-  
587 58.
- 588 43. Bear JE, Gertler FB. Ena/VASP: towards resolving a pointed controversy at the barbed end. *J Cell Sci*. 2009;122(Pt  
589 12):1947-53.
- 590 44. Benz PM, Blume C, Seifert S, Wilhelm S, Waschke J, Schuh K, et al. Differential VASP phosphorylation controls  
591 remodeling of the actin cytoskeleton. *J Cell Sci*. 2009;122(Pt 21):3954-65.
- 592 45. Krause M, Dent EW, Bear JE, Loureiro JJ, Gertler FB. Ena/VASP proteins: regulators of the actin cytoskeleton and  
593 cell migration. *Annu Rev Cell Dev Biol*. 2003;19:541-64.
- 594 46. Winkelman JD, Bilancia CG, Peifer M, Kovar DR. Ena/VASP Enabled is a highly processive actin polymerase  
595 tailored to self-assemble parallel-bundled F-actin networks with Fascin. *Proc Natl Acad Sci U S A*. 2014;111(11):4121-6.
- 596 47. Mullins RD, Heuser JA, Pollard TD. The interaction of Arp2/3 complex with actin: nucleation, high affinity pointed  
597 end capping, and formation of branching networks of filaments. *Proc Natl Acad Sci U S A*. 1998;95(11):6181-6.
- 598 48. Bachmann C, Fischer L, Walter U, Reinhard M. The EVH2 domain of the vasodilator-stimulated phosphoprotein  
599 mediates tetramerization, F-actin binding, and actin bundle formation. *J Biol Chem*. 1999;274(33):23549-57.
- 600 49. Breitsprecher D, Kiesewetter AK, Linkner J, Urbanke C, Resch GP, Small JV, et al. Clustering of VASP actively  
601 drives processive, WH2 domain-mediated actin filament elongation. *EMBO J*. 2008;27(22):2943-54.
- 602 50. Schirenbeck A, Arasada R, Bretschneider T, Stradal TE, Schleicher M, Faix J. The bundling activity of vasodilator-  
603 stimulated phosphoprotein is required for filopodium formation. *Proc Natl Acad Sci U S A*. 2006;103(20):7694-9.
- 604 51. Doppler H, Storz P. Regulation of VASP by phosphorylation: consequences for cell migration. *Cell Adh Migr*.  
605 2013;7(6):482-6.
- 606 52. Valm AM, Cohen S, Legant WR, Melunis J, Hershberg U, Wait E, et al. Applying systems-level spectral imaging  
607 and analysis to reveal the organelle interactome. *Nature*. 2017;546(7656):162-7.
- 608



## 609 **FIGURE LEGENDS**

610

### 611 **Figure 1. Granger-causality framework to probe functional relations in complex molecular systems**

612 (A) Representation of the complex regulatory circuits integrating cell-intrinsic biochemical and -extrinsic  
613 mechanical and chemical cues in the regulation of lamellipodial dynamics (B) Granger-causality analysis is a  
614 statistical test that distinguishes causation from correlation. (C-E) Examples of nonlinear regulatory motifs  
615 between molecular processes including (C) feedback, (D) redundant pathways, and (E) nested feedbacks. (F-  
616 G) Interpretation of Granger-causality in the presence of unobserved latent factors.

617

### 618 **Figure 2. Workflow of Granger-causal pathway inference in the study of lamellipodial actin dynamics**

619 (i) Time-lapse fluorescence images of molecules of interest serve as input to infer Granger-causal relations  
620 among the molecular processes. (ii) Computer vision algorithms track cell boundaries and probing windows  
621 over time to extract cell edge protrusion/retraction velocities and spatiotemporal recruitments of the molecules.  
622 (iii) Spatiotemporal fluctuation maps of Arp2/3 (left) and actin (middle) at  $\sim 0-0.7 \mu\text{m}$  from the edge and cell  
623 edge velocities (right). (iv) A Granger-causality (GC) test determines whether the Arp2/3 recruitment profile is  
624 indispensable for predicting the F-actin assembly in the same probing window. (v) P-values of the GC tests in  
625 individual windows provide subcellular evidence of the causal link from Arp2/3 recruitment to F-actin assembly.  
626 (vi) The subcellular GC P-values from multiple independent cells are integrated into per-cell median P-values  
627 to further test whether causal evidence consistently appears over multiple cells. (vii) The determined Granger-  
628 causal relations are represented as graphs, drawn separately for probing window layers at increasing  
629 distances from the edge.

630

### 631 **Figure 3. Actin and Arp2/3 intensity fluctuations correlate with edge motion**

632 (A) Auto-correlation functions (ACFs) of edge velocity and the recruitment of actin and Arp2/3 in the band  $\sim 0-$   
633  $0.7 \mu\text{m}$  from the edge. Black curves are per-cell averaged ACFs ( $n = 10$  cells), and red curves display their  
634 averages. (B-C) Spatiotemporal maps of low-frequency (LF) fluctuations (B) and low-frequency subtracted  
635 (LFS) fluctuations (C) of actin assembly in the band  $\sim 0-0.7 \mu\text{m}$ . (D-E) LF fluctuations (D) and LFS fluctuations  
636 (E) of Arp2/3 recruitment in the band  $\sim 0-0.7 \mu\text{m}$ . (F-G) ACFs of LFS-recruitment of actin (F) and Arp2/3 (G) in  
637 the band  $\sim 0-0.7 \mu\text{m}$ . Black curves are per-cell averaged ACFs ( $n = 10$ ), and red curves display their averages.  
638 (H-I) Cross-correlations of LFS-actin (H) and LFS-Arp2/3 (I) with the edge velocity in individual windows within  
639 lamellipodia and lamella for a representative cell. (J-K) Per-cell averaged cross-correlation curves ( $n = 20$ ,  
640 black) of LFS-actin (J) and LFS-Arp2/3 (K) with the edge velocity. Red curves display their averages. Cell-to-  
641 cell variability is shown by  $\pm 2 \times \text{SEM}$  (shaded red bands).

642

### 643 **Figure 4. Granger-causality analysis establishes a causal chain from Arp2/3 to F-actin to edge motion**

644 (A-B) Spatial propagation patterns of molecular activities are annotated on a single time point image of a U2OS  
645 cell co-expressing mNeonGreen-tagged actin (A) and cytoplasmic HaloTag (B). Magenta windows (left panel)  
646 indicate the subcellular regions where molecular fluctuations propagate to four adjacent windows. Arrows (right  
647 panel) separately display the spatial propagation in the four different directions. Scale bars,  $5 \mu\text{m}$ . (C) Arp2/3  
648 and actin activity maps and the associated P-values of the GC from Arp2/3 to actin in individual windows for a  
649 representative cell. White regions in the map for  $\sim 1.4-2.2 \mu\text{m}$  indicate the absence of corresponding probing  
650 windows due to cell morphology. Red indicates significant P-values. (D) The GC from actin to the edge velocity  
651 represented as described in (C). (E) Boxplots of per-cell median P-values ( $n = 20$ ) for six directional Granger-

causal relations between Arp2/3, actin and edge velocity at different distances from the cell edge. The symbol (\*) indicates that the per-cell median P-values are significantly smaller than the nominal level 0.05 (Wilcoxon signed rank test).

### Figure 5. mDia1 possesses spatially segregated actin polymerization-dependent and polymerization-independent functions in the lamellipodia

(A) Characterization of cells expressing exogenous SNAP-tagged mDia1 (left panel) and endogenously labeled mNG<sub>11</sub>-mDia1 (right panel). (B) Comparison of molecular sizes of the tagged mDia1s drawn to scale. (C) Representative image of SNAP-actin and endogenously labeled mNeonGreen2-mDia1 observed in a cell. Scale bars, 5  $\mu$ m. (D) mDia1 and actin activity maps and their associated P-values of the GC from mDia1 to actin in the lamellipodia back (left panel) and lamellipodia-to-lamella transition area (right panel) from the cell shown in (C). Red indicates significant P-values. (E) Boxplots of per-cell median P-values (n = 14) of Granger-causal relations between mDia1, actin and edge velocity. The symbol (\*) indicates that the per-cell P-values are significantly smaller than 0.05 (Wilcoxon signed rank test). (F) GC pathway diagrams between mDia1, actin and edge velocity in the lamellipodia and lamella regions.

### Figure 6. Granger-causality analysis distinguishes mutant phenotypes from wild-type VASP recruitment profiles co-imaged within the same cells

(A) Representative images of a U2OS cell (left) co-expressing mNeonGreen-actin, SNAP-tagged wild-type VASP (VASP<sup>WT</sup>) and Halo-tagged S239D/T278E VASP mutant (VASP<sup>MT</sup>). Scale bars, 5  $\mu$ m. The insets are enlarged in the right panel. (B) Per-cell averaged cross-correlation curves (n = 18, black) of VASP<sup>WT</sup> (left) and VASP<sup>MT</sup> (right) with the edge velocity. Red curves display their averages. Cell-to-cell variability is shown by  $\pm 2 \times$  SEM (shaded red bands). (C) Activity maps of actin, VASP<sup>WT</sup> (left) and VASP<sup>MT</sup> (right), and the associated P-values of the GC from VASP<sup>WT</sup> and VASP<sup>MT</sup> to actin in the lamellipodia front from the cell shown in (A). Red indicates significant P-values. (D) Boxplots of per-cell median P-values (n = 18) of Granger-causal relations for VASP<sup>WT</sup> (left) and VASP<sup>MT</sup> (right). The symbol (\*) indicates that the per-cell P-values are significantly smaller than 0.05 (Wilcoxon signed rank test). (E) Granger-causal relations among VASP<sup>WT</sup>, actin and edge velocity as described in (D). (F) GC pathway diagrams between VASP<sup>WT</sup>, actin and edge velocity in the lamellipodia and lamella regions.

### Figure 7. Two discrete F-actin networks drive edge motion

(A) A single time point image of a U2OS cell co-expressing endogenously Halo-tagged Arp3 and exogenous SNAP-tagged VASP. Scale bars, 5  $\mu$ m. (B) Arp2/3 (1<sup>st</sup> panel) and VASP (2<sup>nd</sup> panel) activities at the lamellipodia front from the cell shown in (A). Associated P-values of the GC from Arp2/3 to VASP (3<sup>rd</sup> panel) and from VASP to Arp2/3 (4<sup>th</sup> panel) in individual windows. Red indicates significant P-values. (C) Boxplots of per-cell median P-values (n = 18) of Granger-causal relations between Arp2/3, VASP and edge velocity at different distances from the cell edge. The symbol (\*) indicates that the per-cell P-values are significantly smaller than 0.05 (Wilcoxon signed rank test). (D) GC pathway diagrams between Arp2/3, VASP and edge velocity in the lamellipodia and lamella regions.

**A**

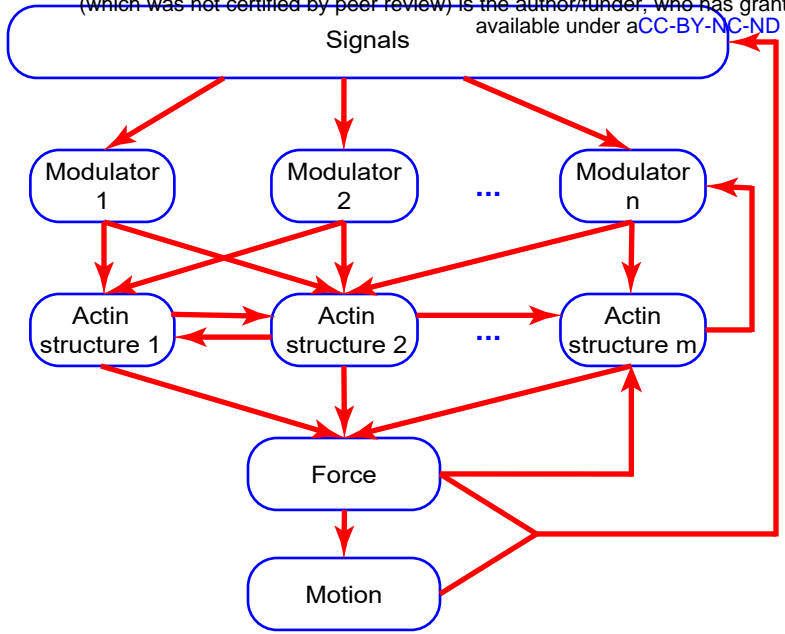

**B**

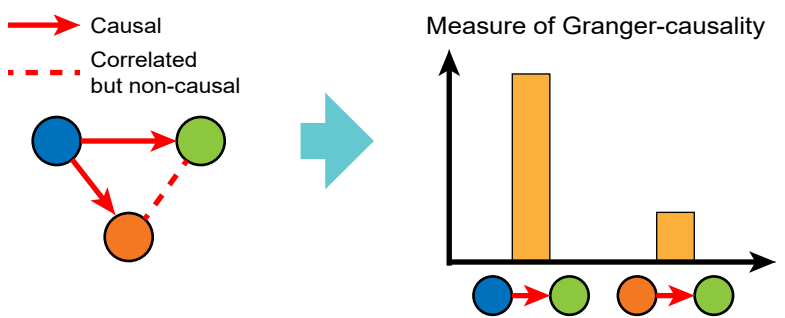

**C**

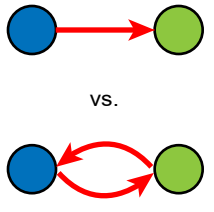

**D**

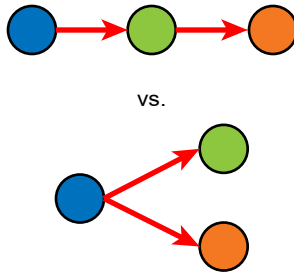

**E**

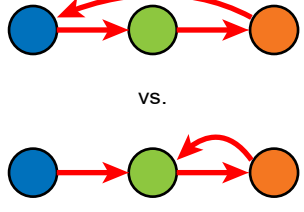

**F**

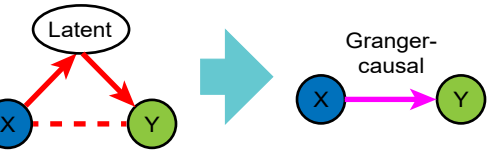

**G**

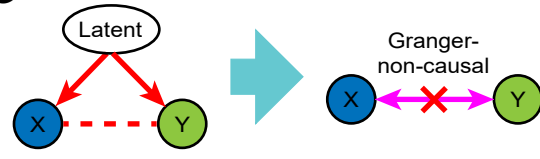

(i) Live cell fluorescence movies

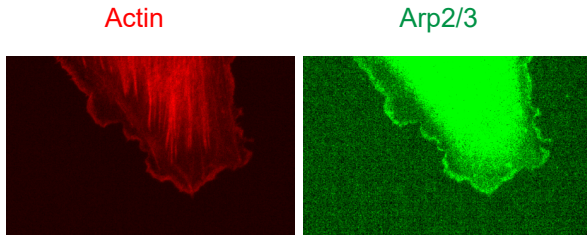

(ii) Tracking morphodynamic/molecular activities

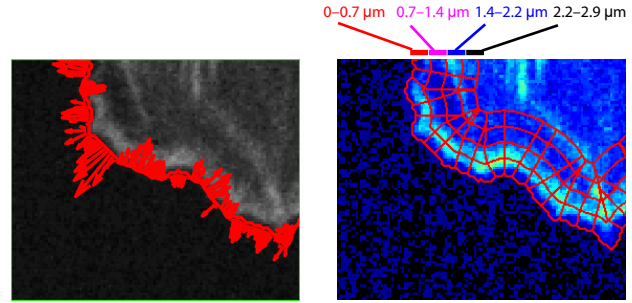

(iii) Readouts of subcellular activities

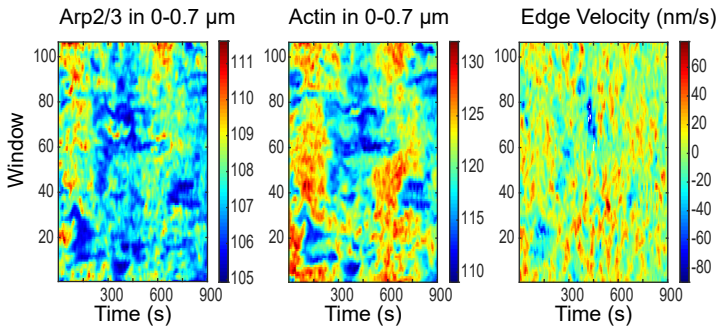

(iv) Granger-causality (GC) test at a single window

**Full Model**

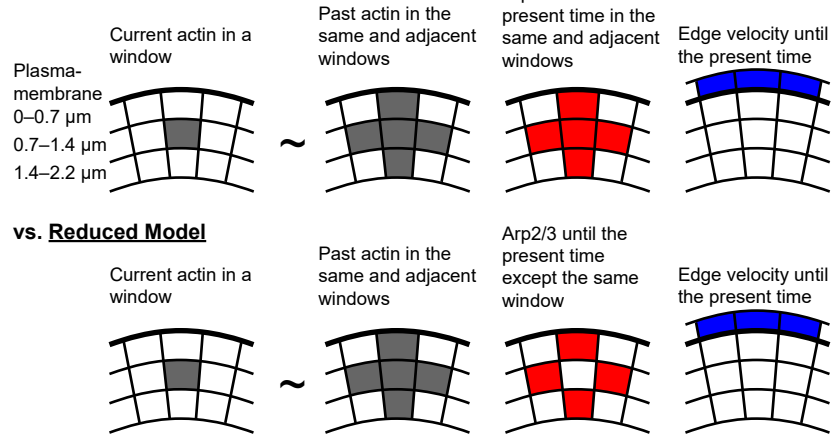

If Full Model  $\gg$  Reduced Model, Arp2/3  $\rightarrow$  Actin in the window.

(v) Subcellular causal evidences for one cell

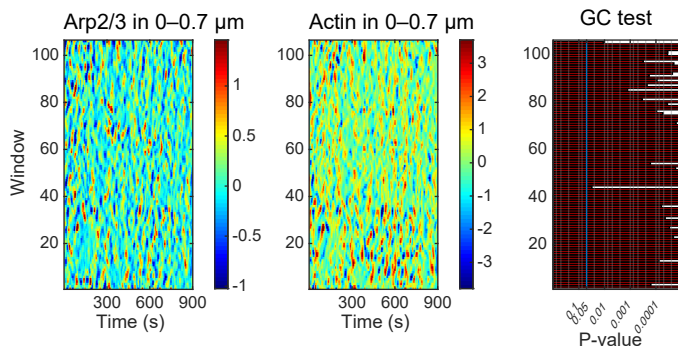

(vi) Granger-causal evidences for multiple cells

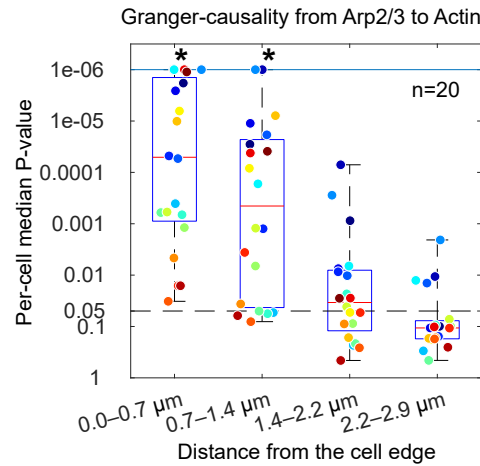

(vii) Granger-causal pathway diagram

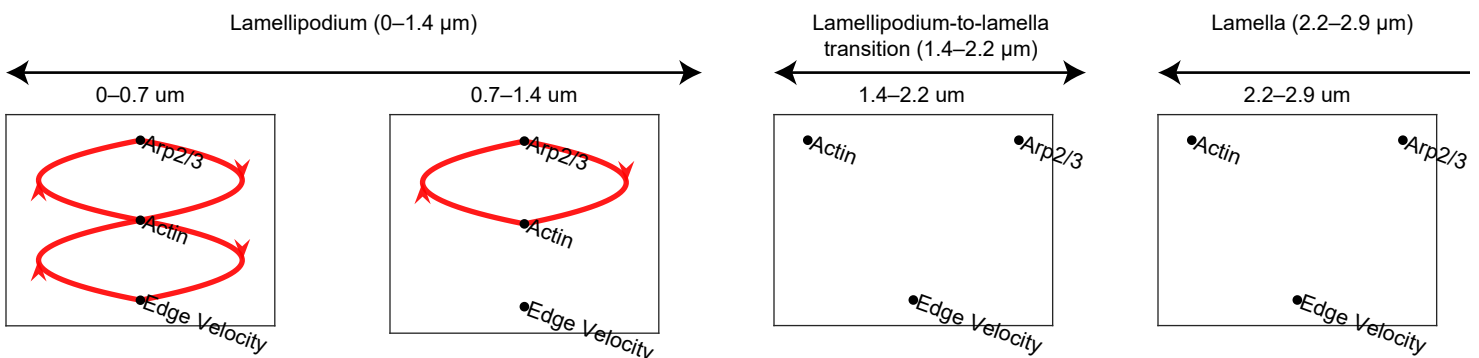



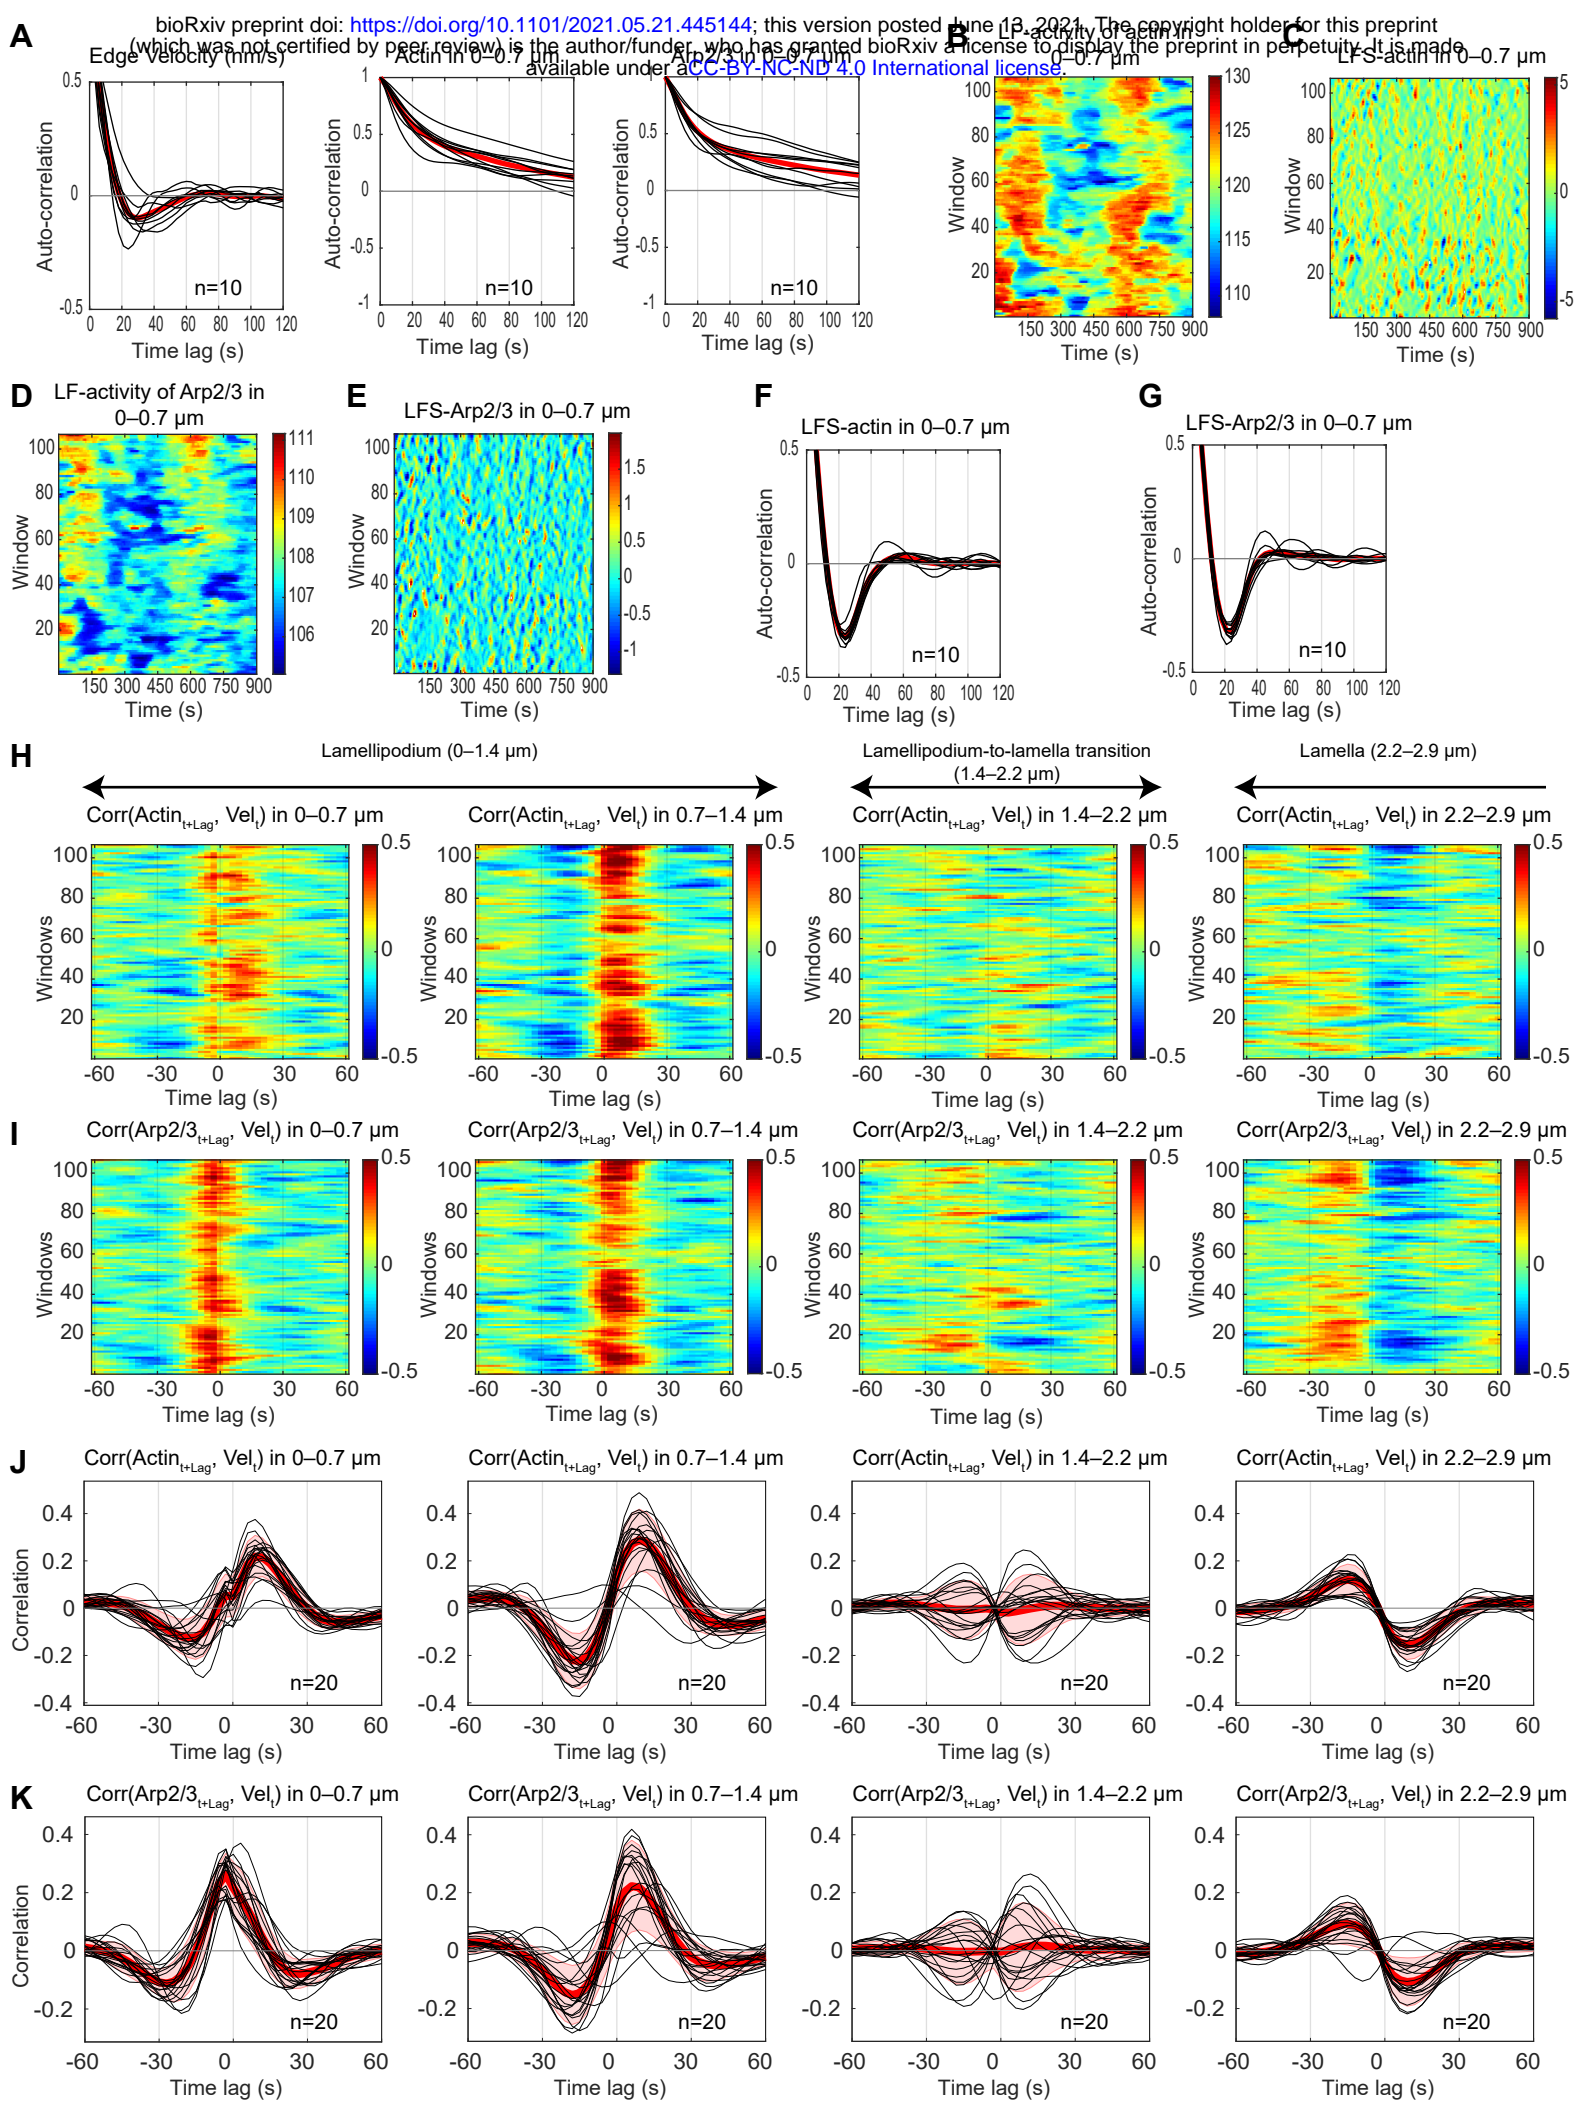

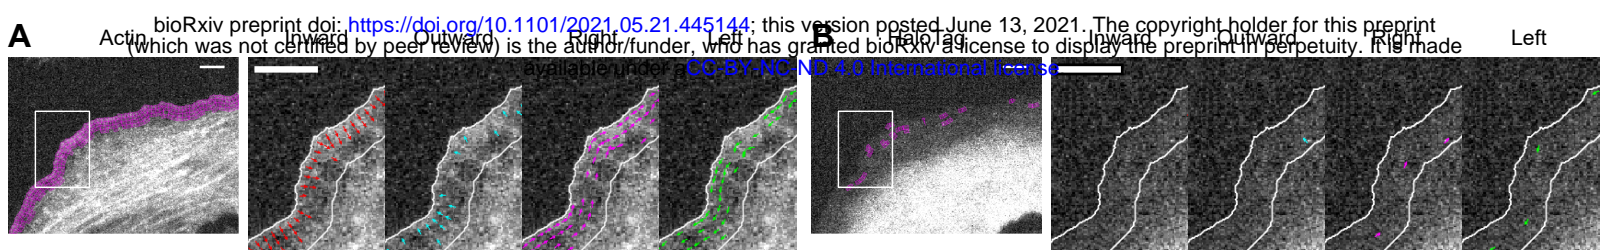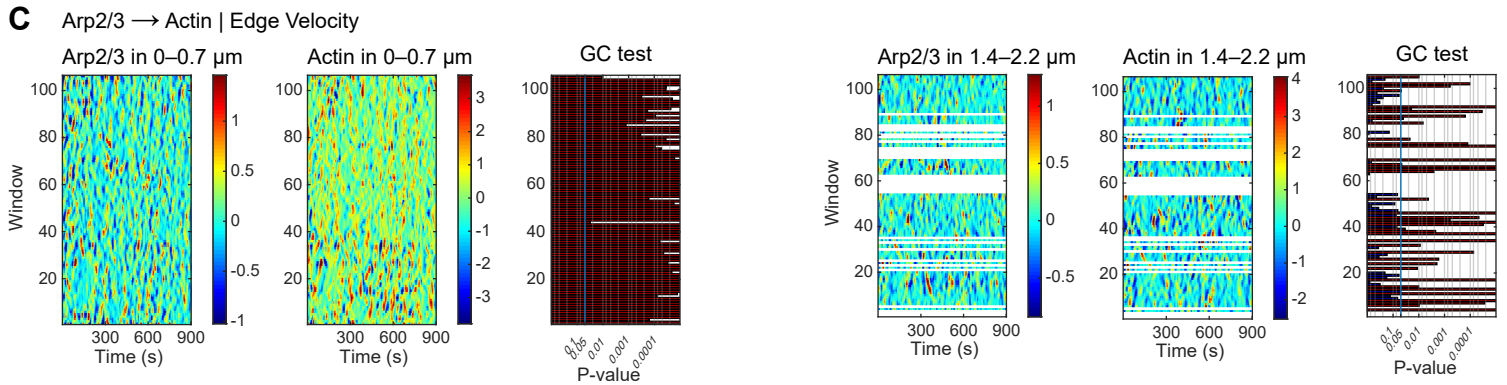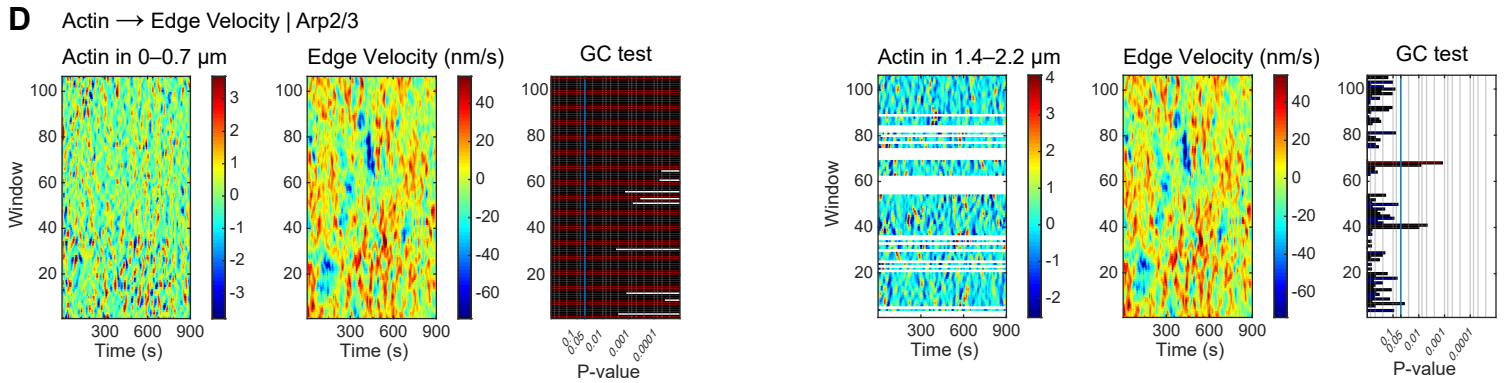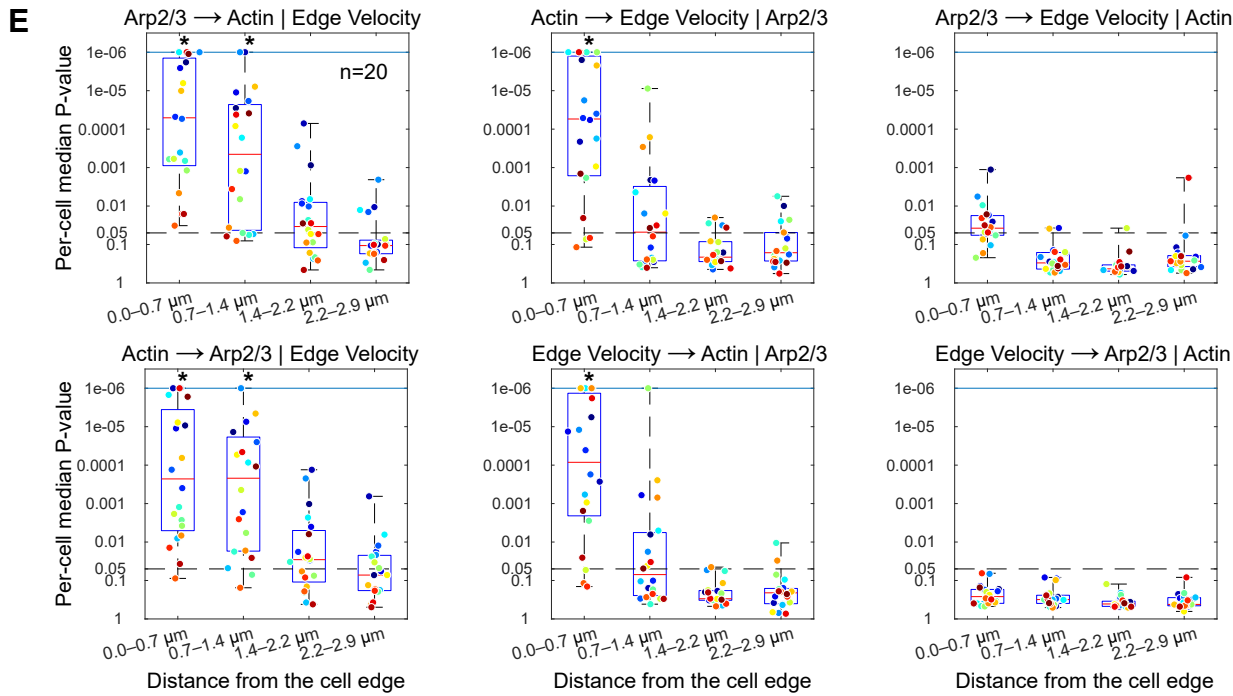

**A**

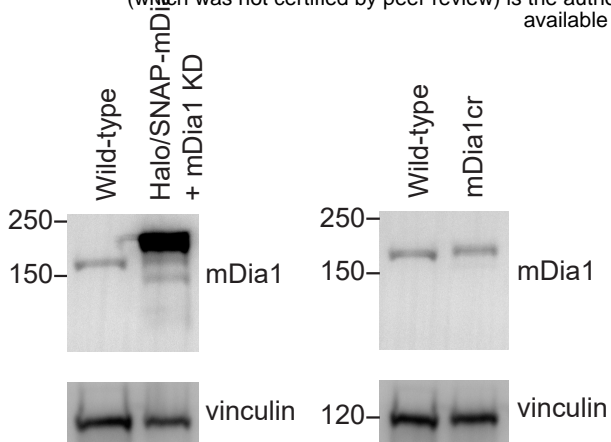

**B**

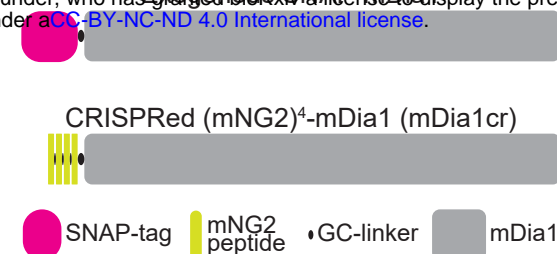

**C**

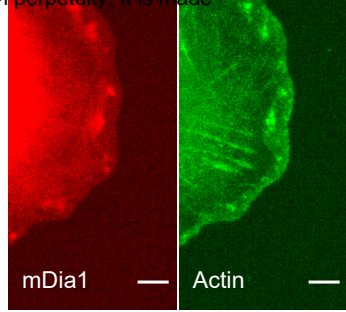

**D**

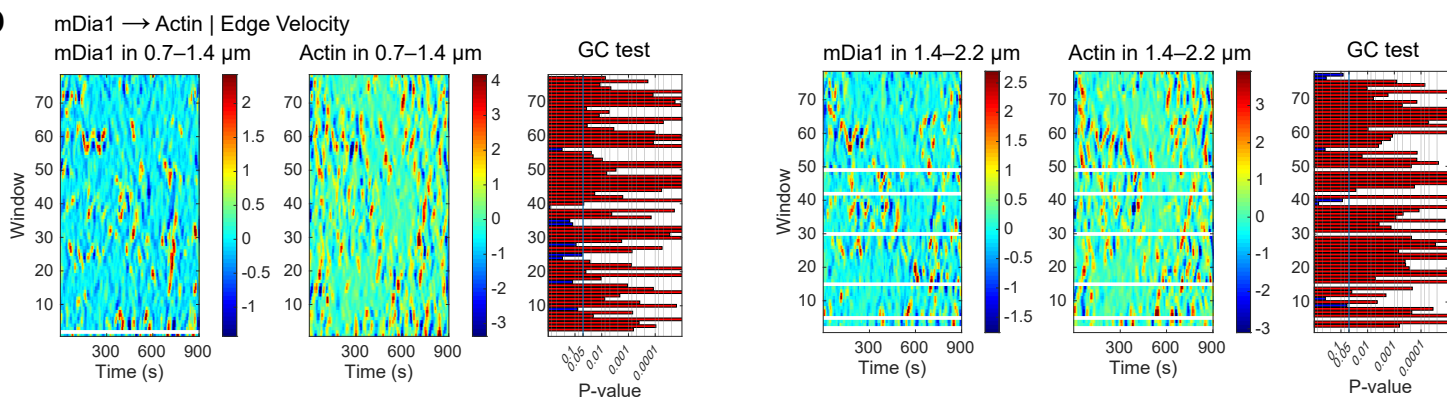

**E**

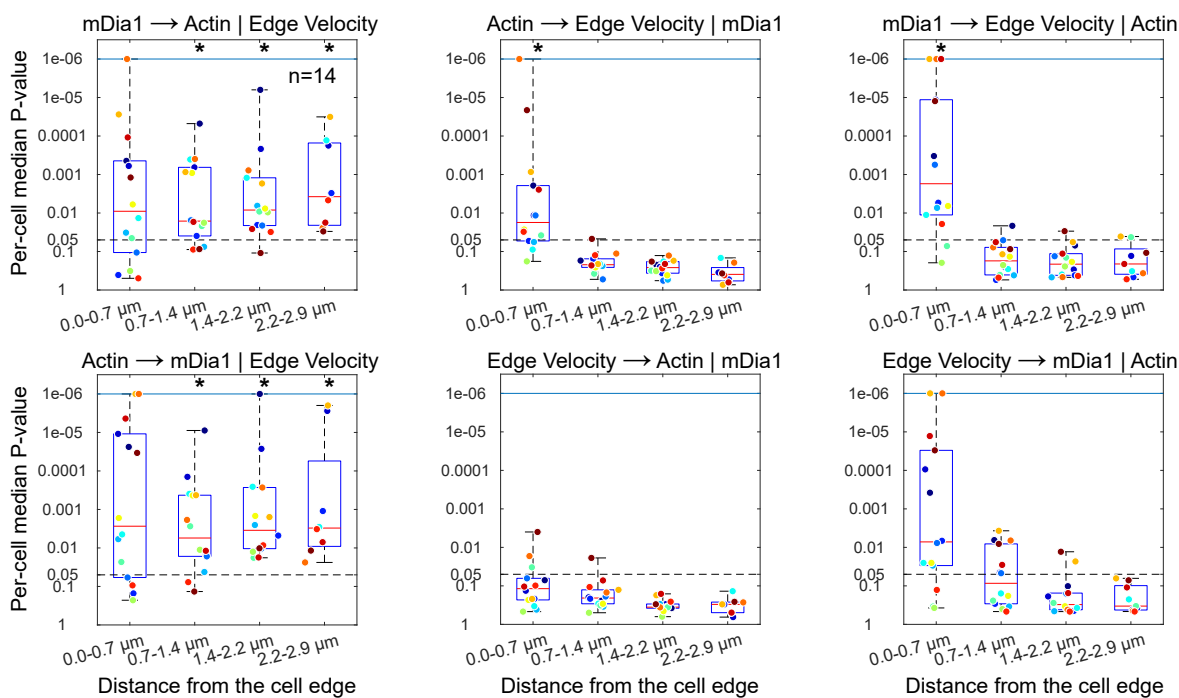

**F**

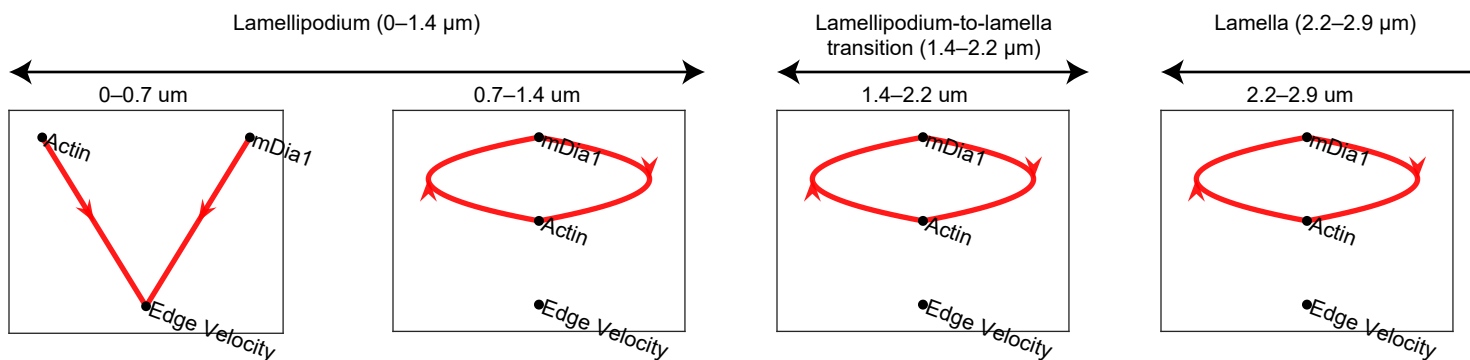



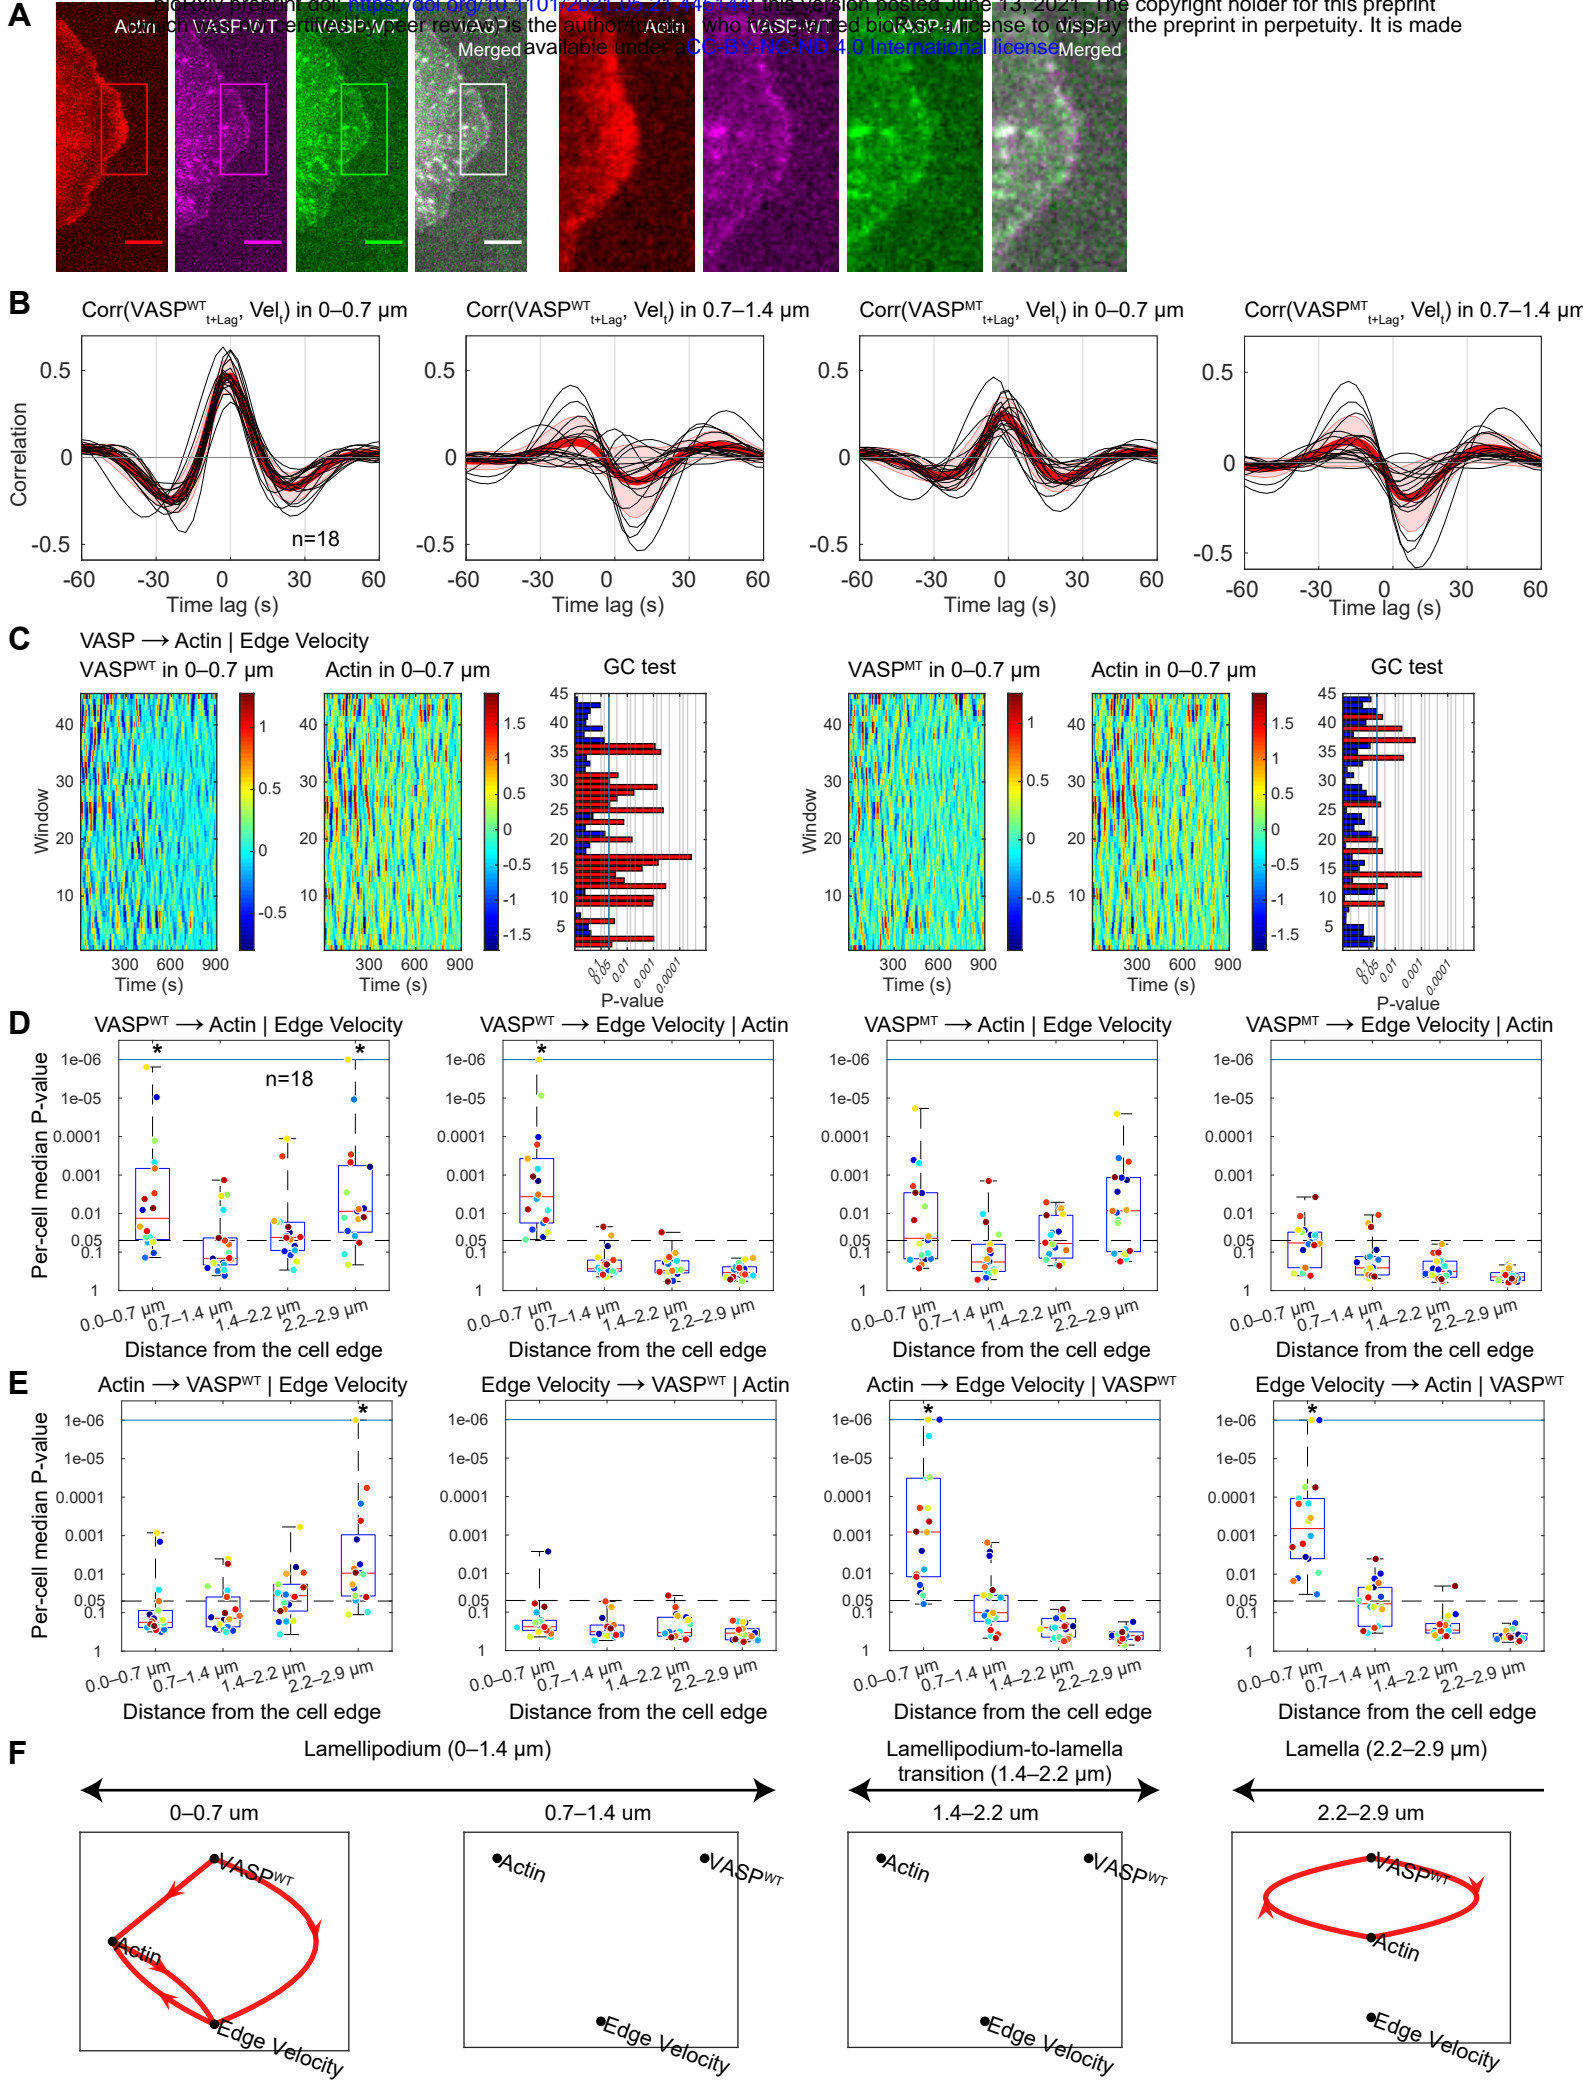

**A**

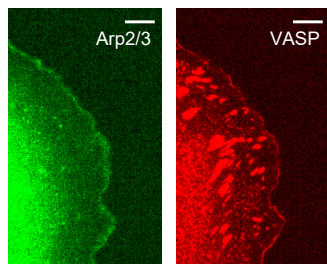

**B**

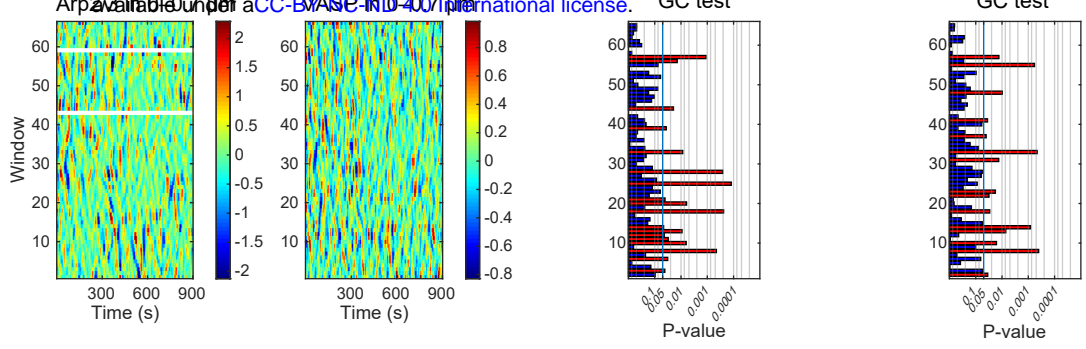

**C**

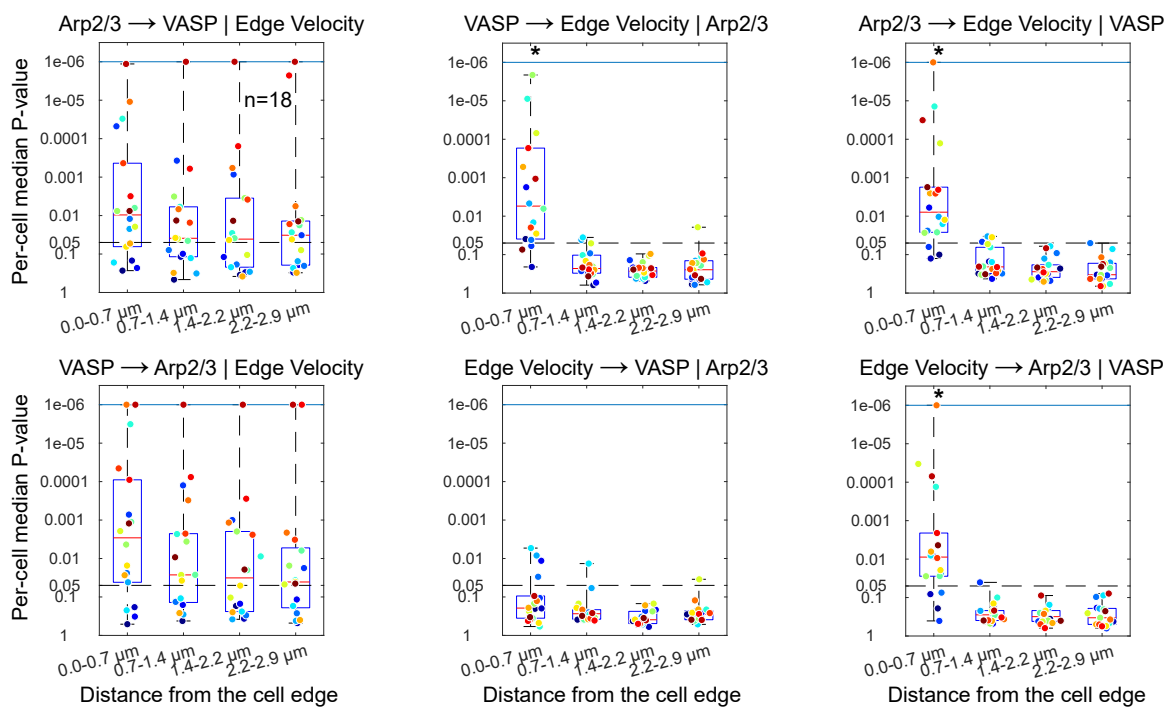

**D**

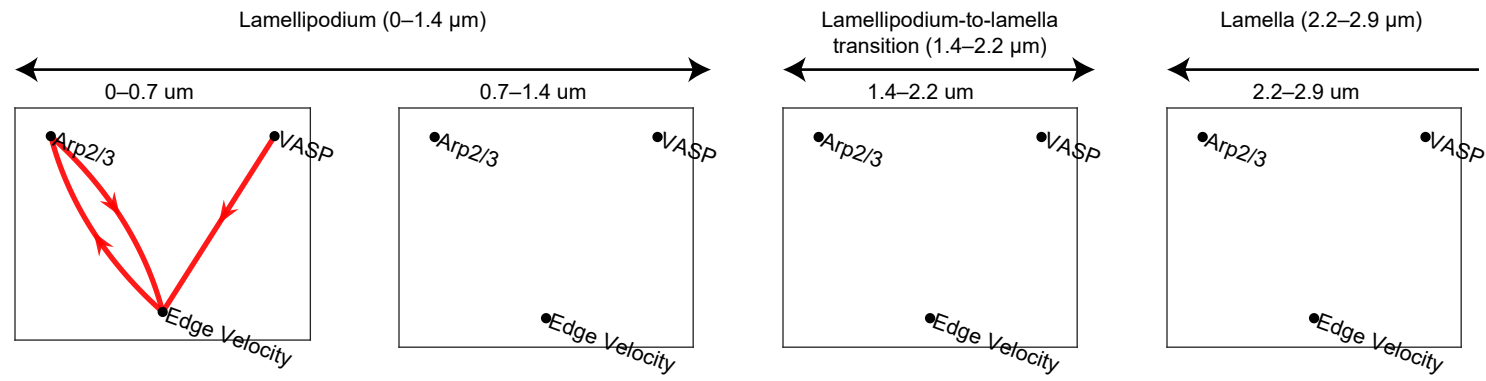

Source: https://www.biorxiv.org/content/10.1101/2021.05.21.445144v2.full.pdf
